# Supplementary material
Source: PubMed Central journal article supplement (PMC8553674)

**A.**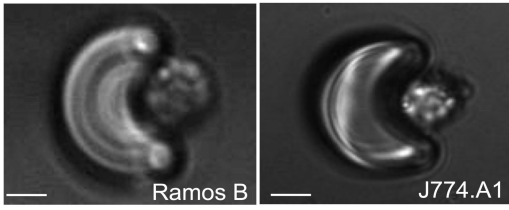**B.**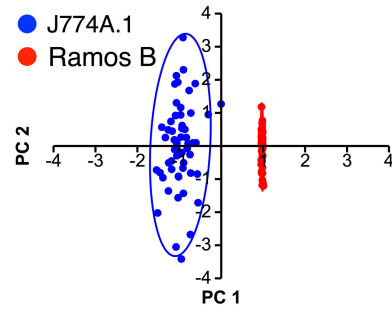**C.**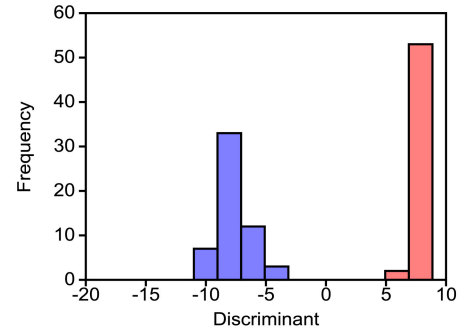**D.**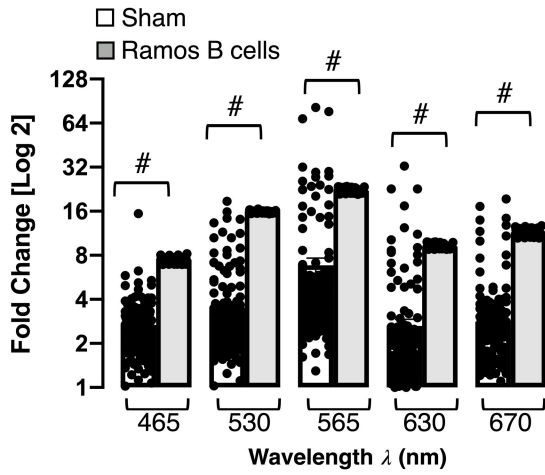**E.**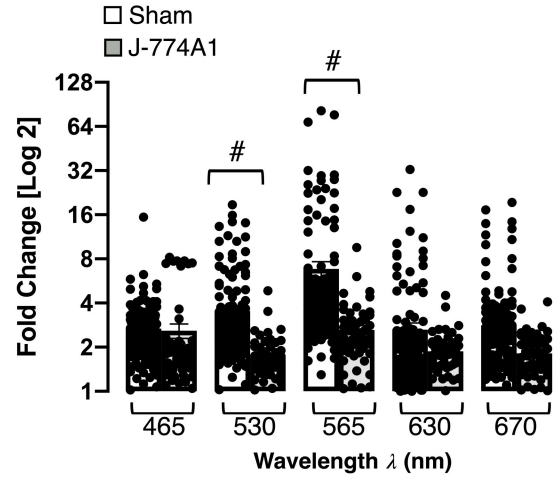**F.**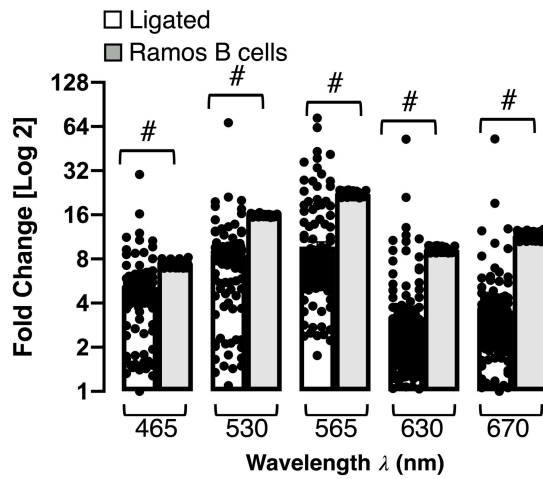**G.**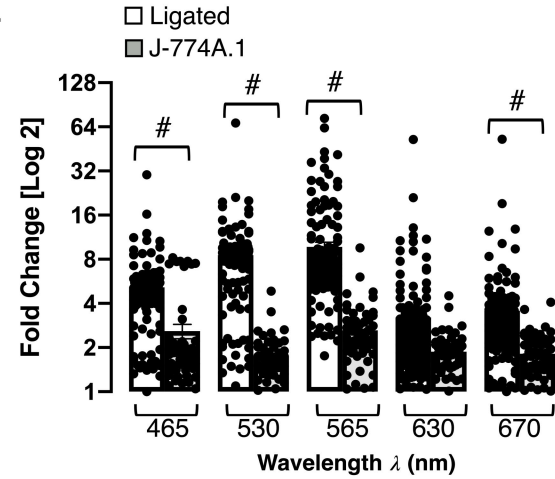**H.**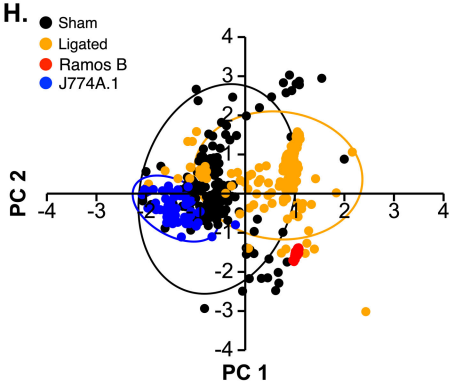**I.**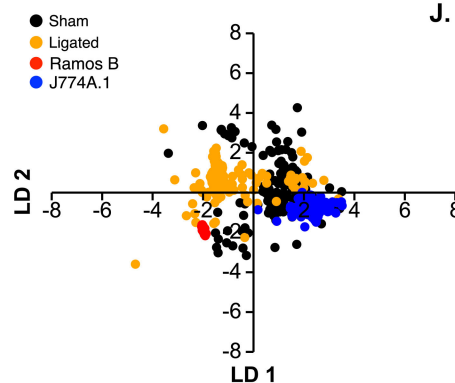**J.**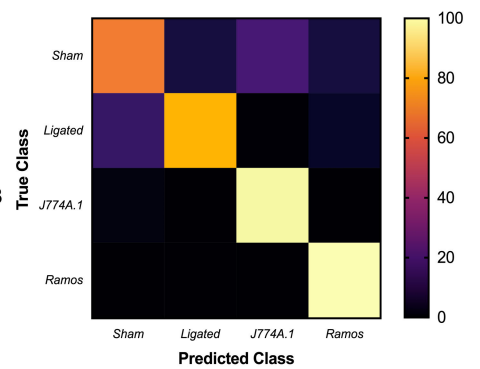

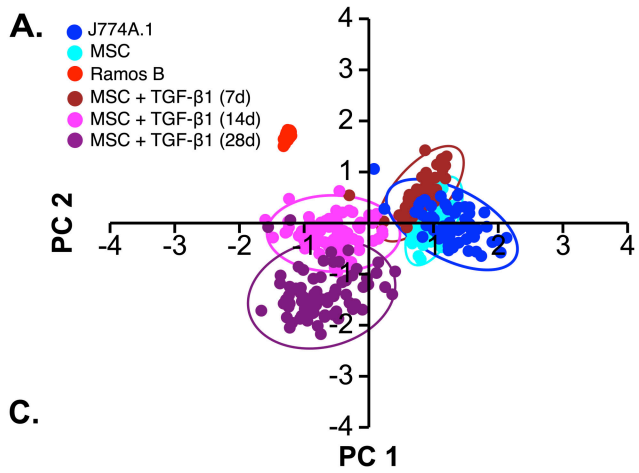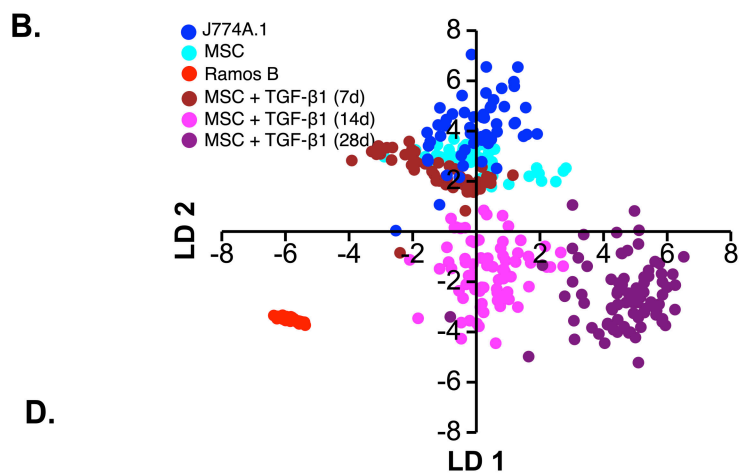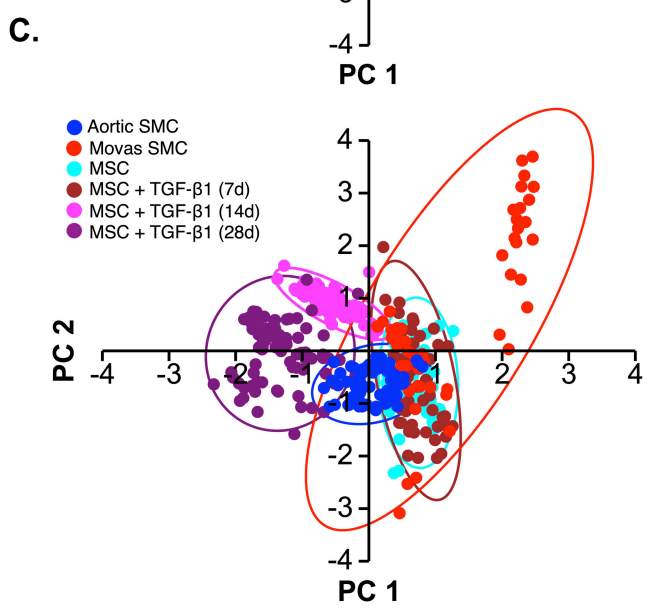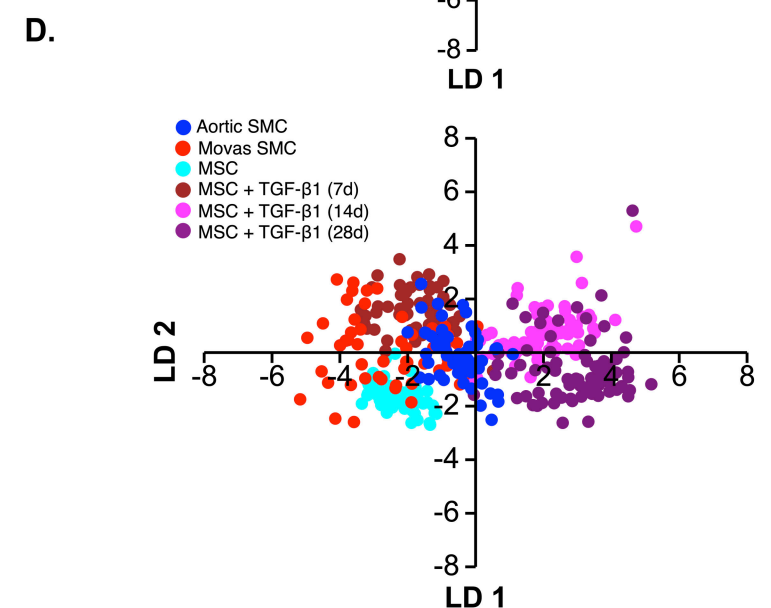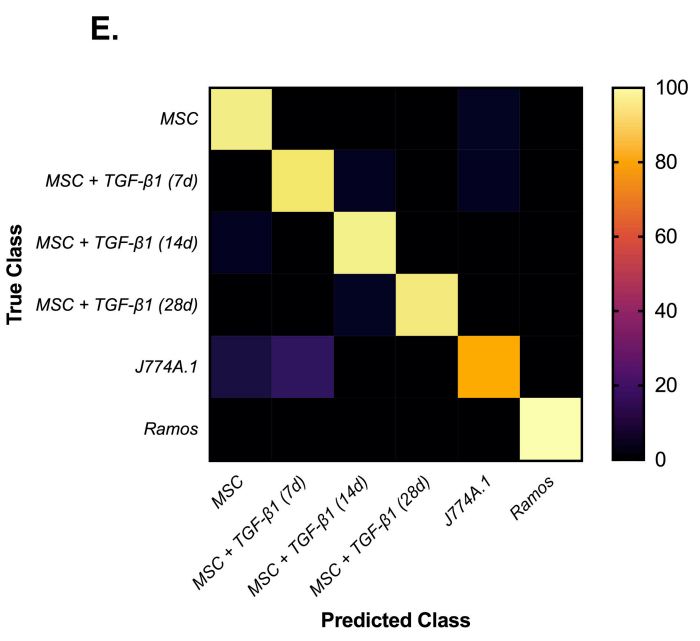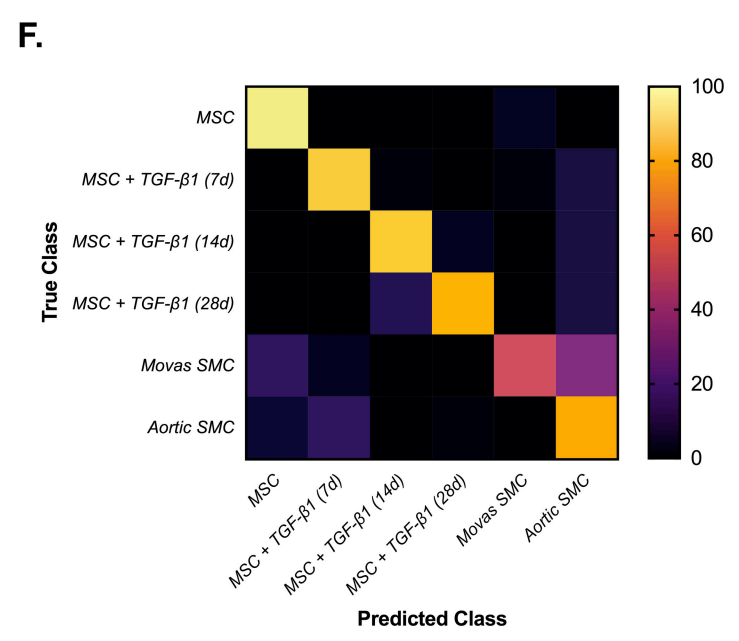

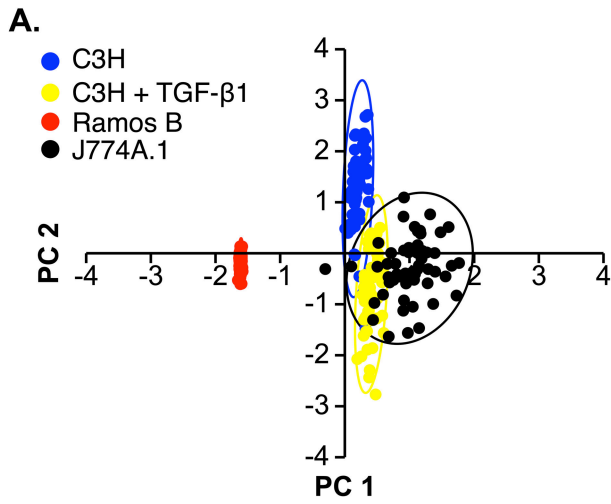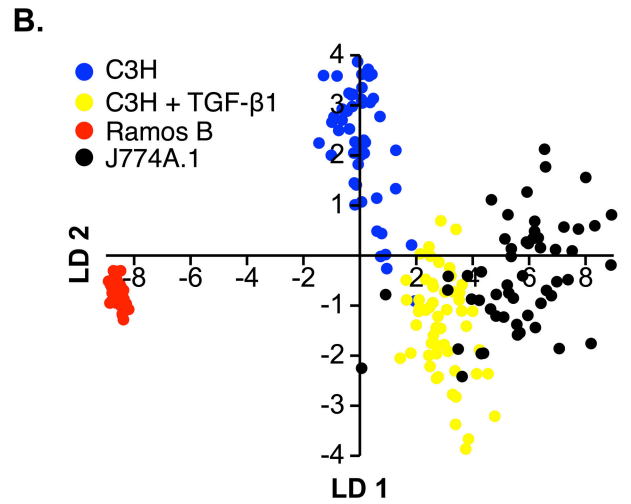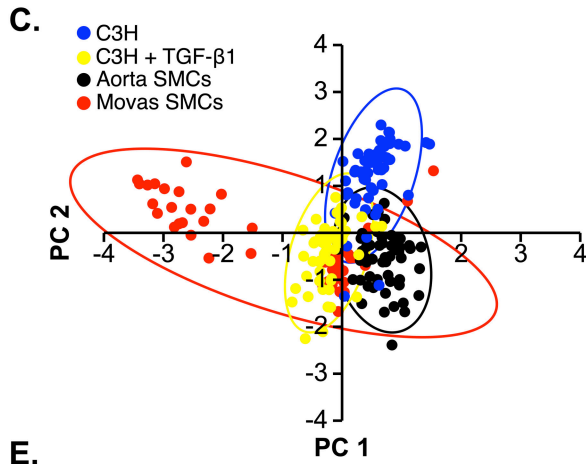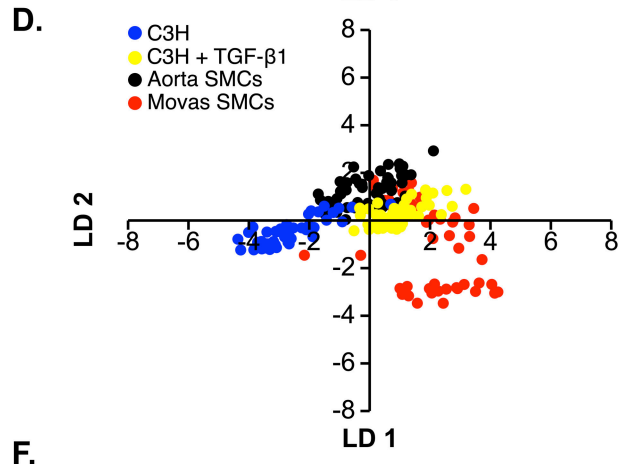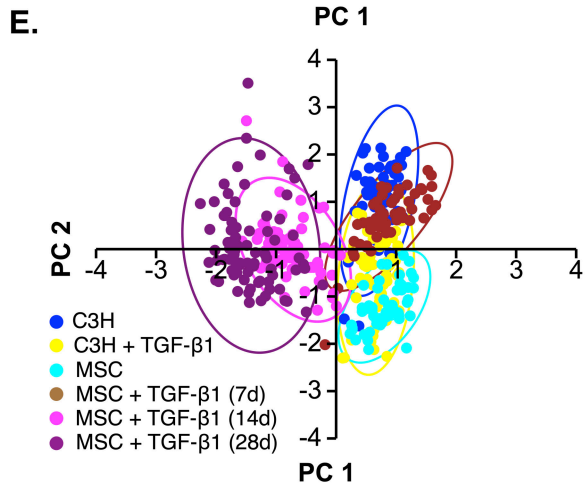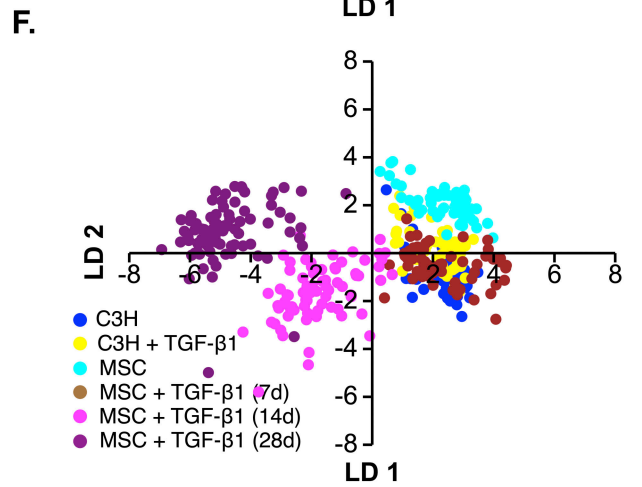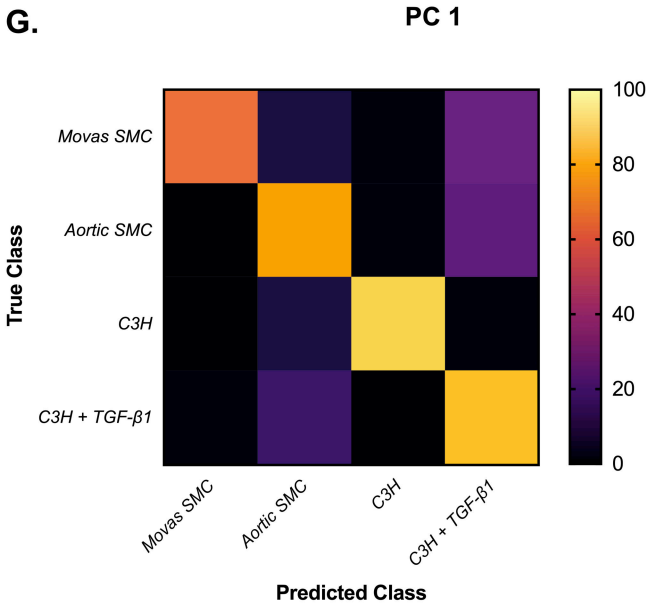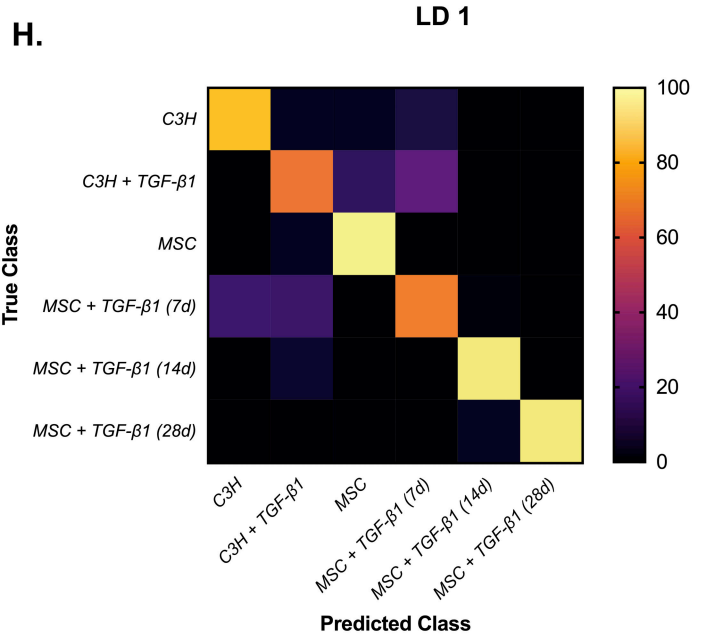

**A.**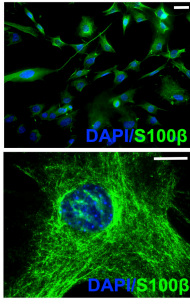**B.**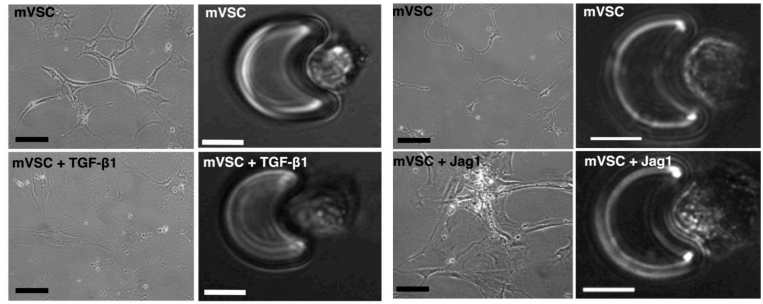**C.**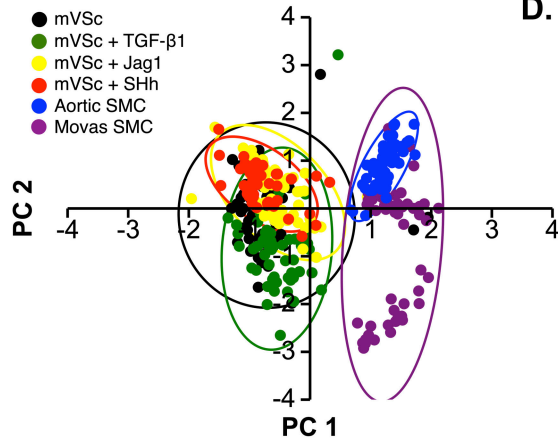**D.**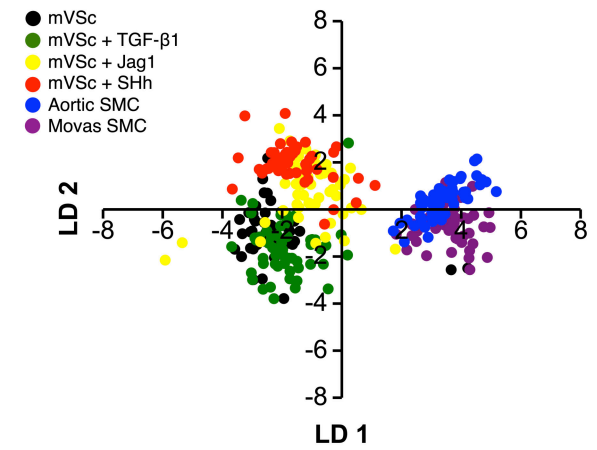**E.**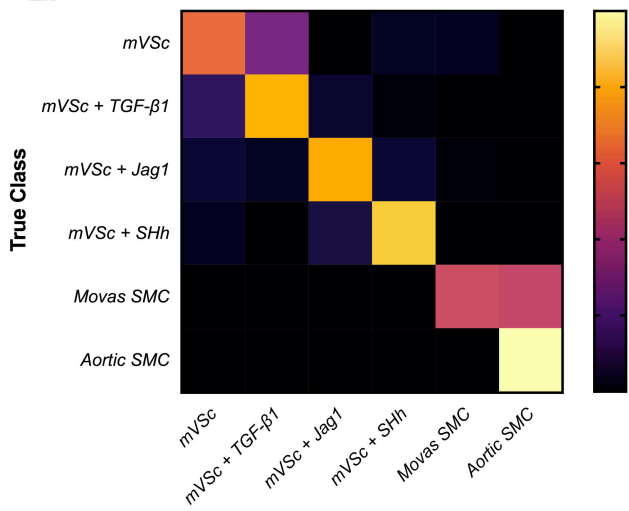**F.**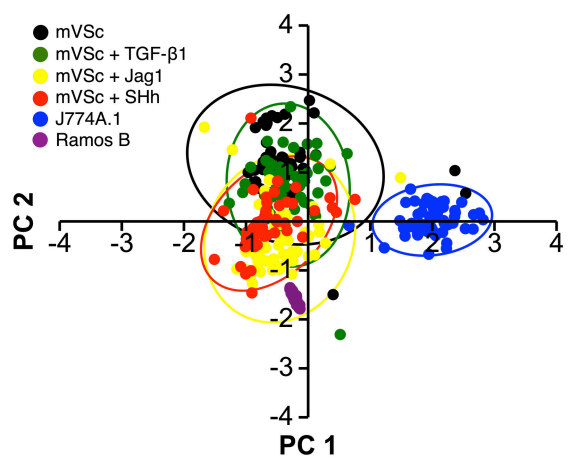**G.**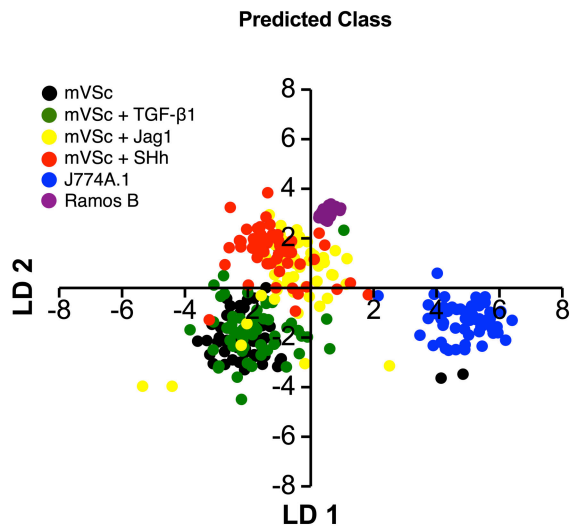**H.**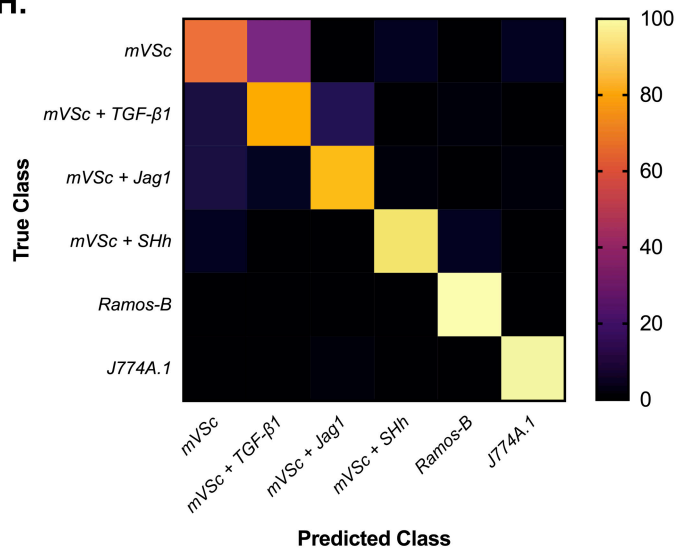

**A.**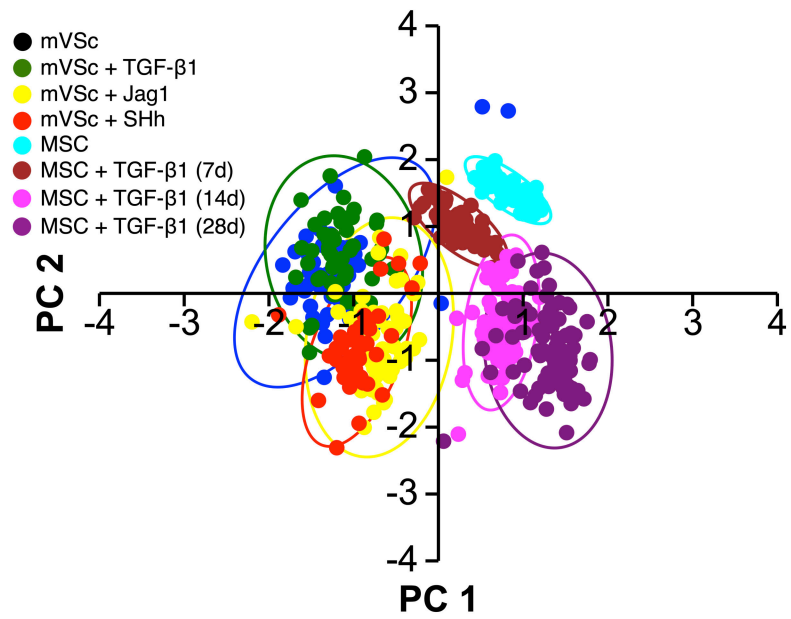**B.**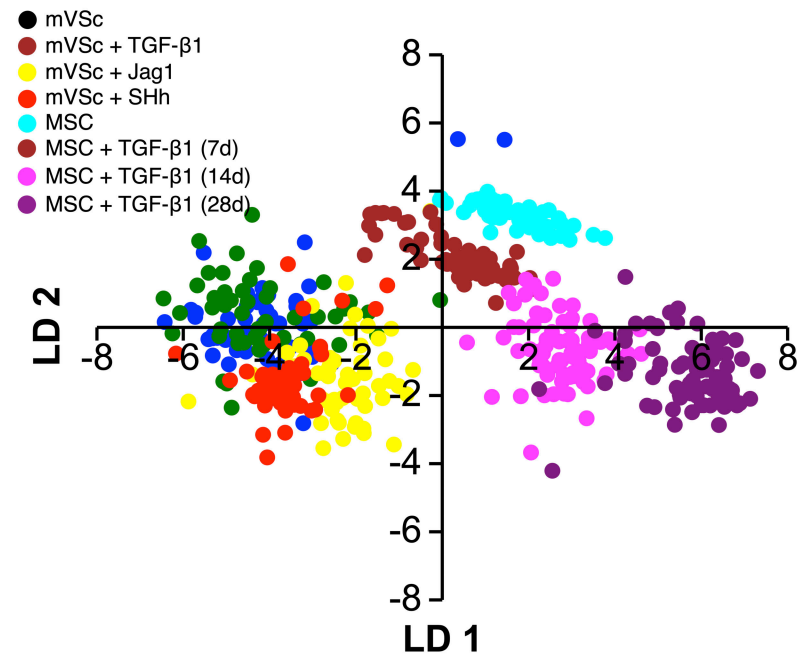**C.**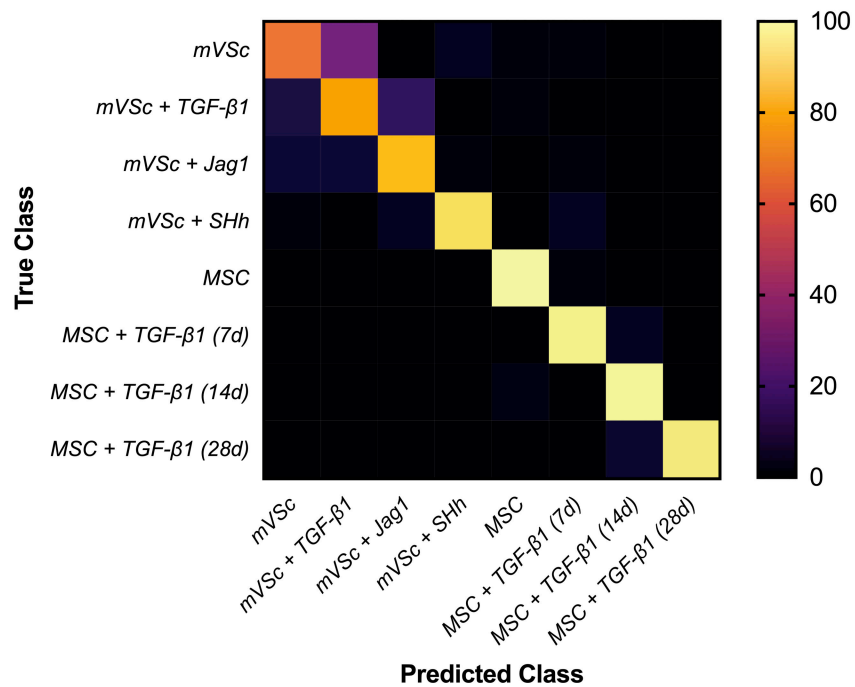

A.

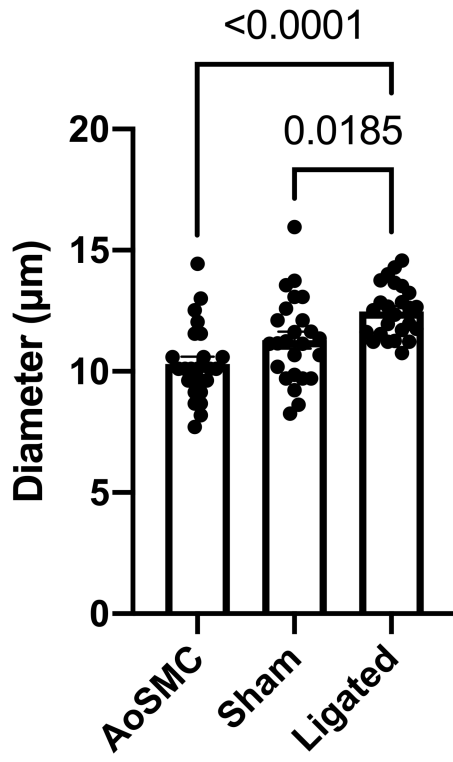

B.

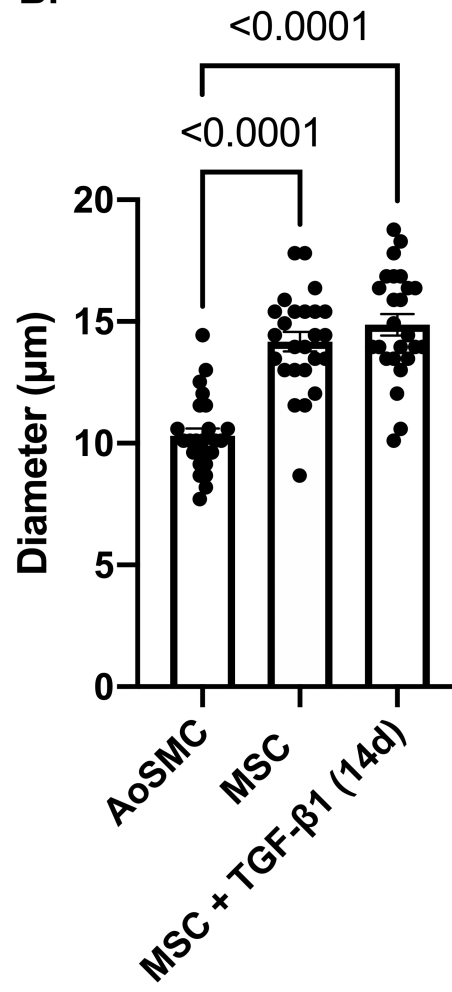

C.

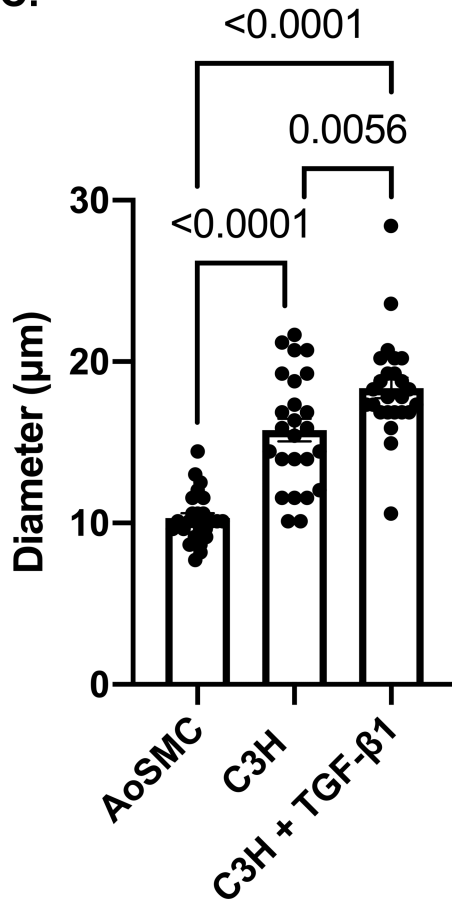

D.

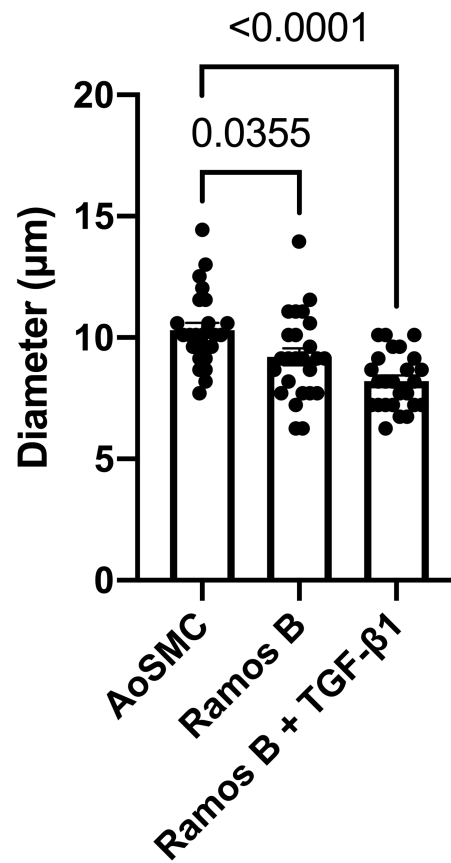

**A.**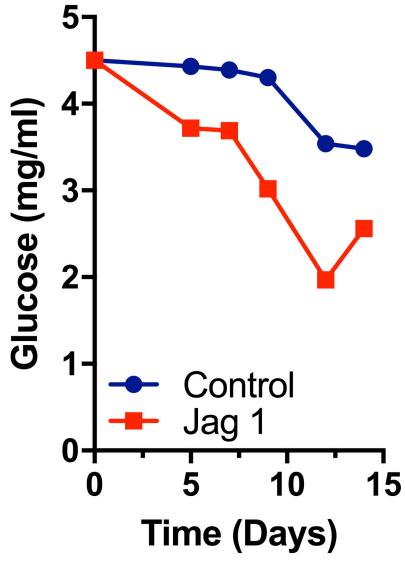**B.**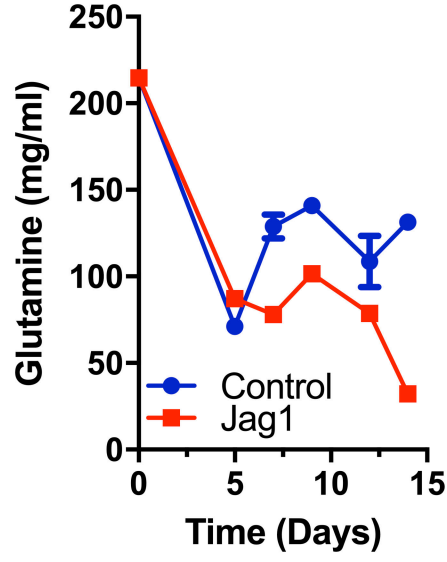**C.**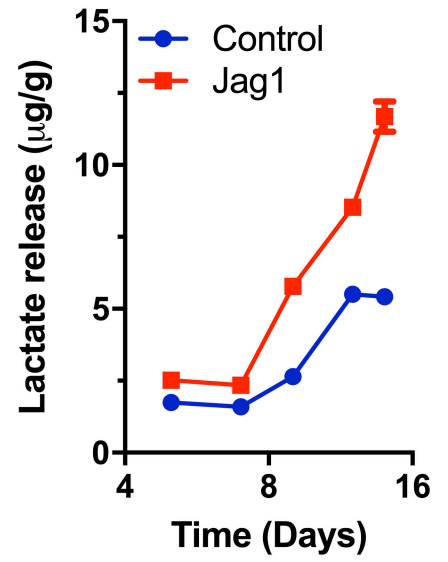**D.**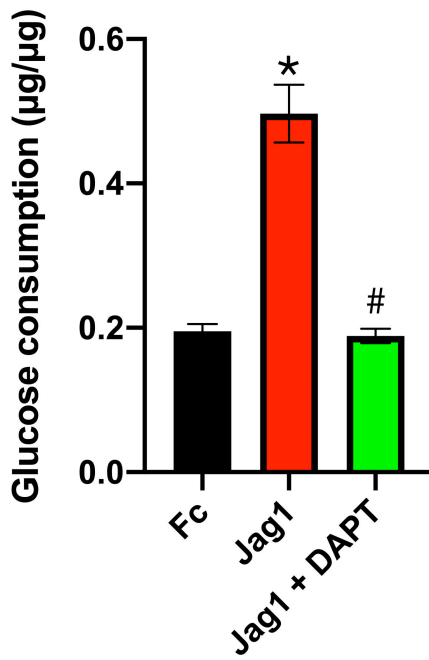**E.**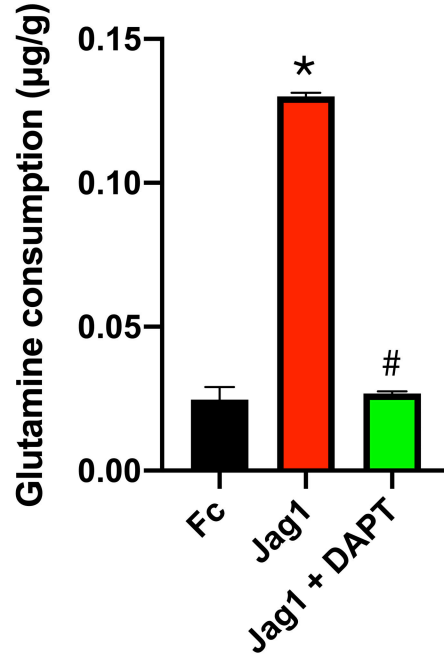**F.**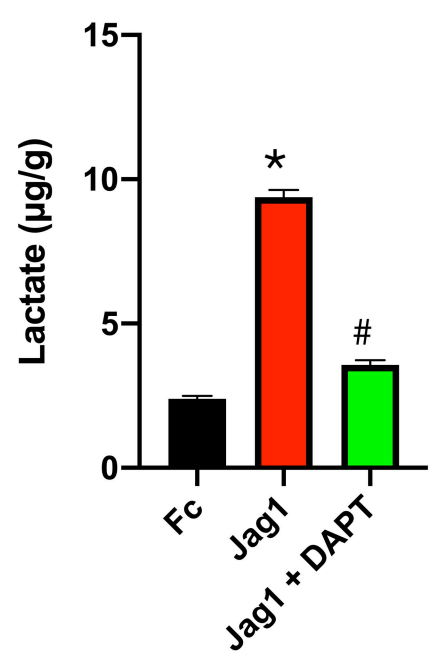

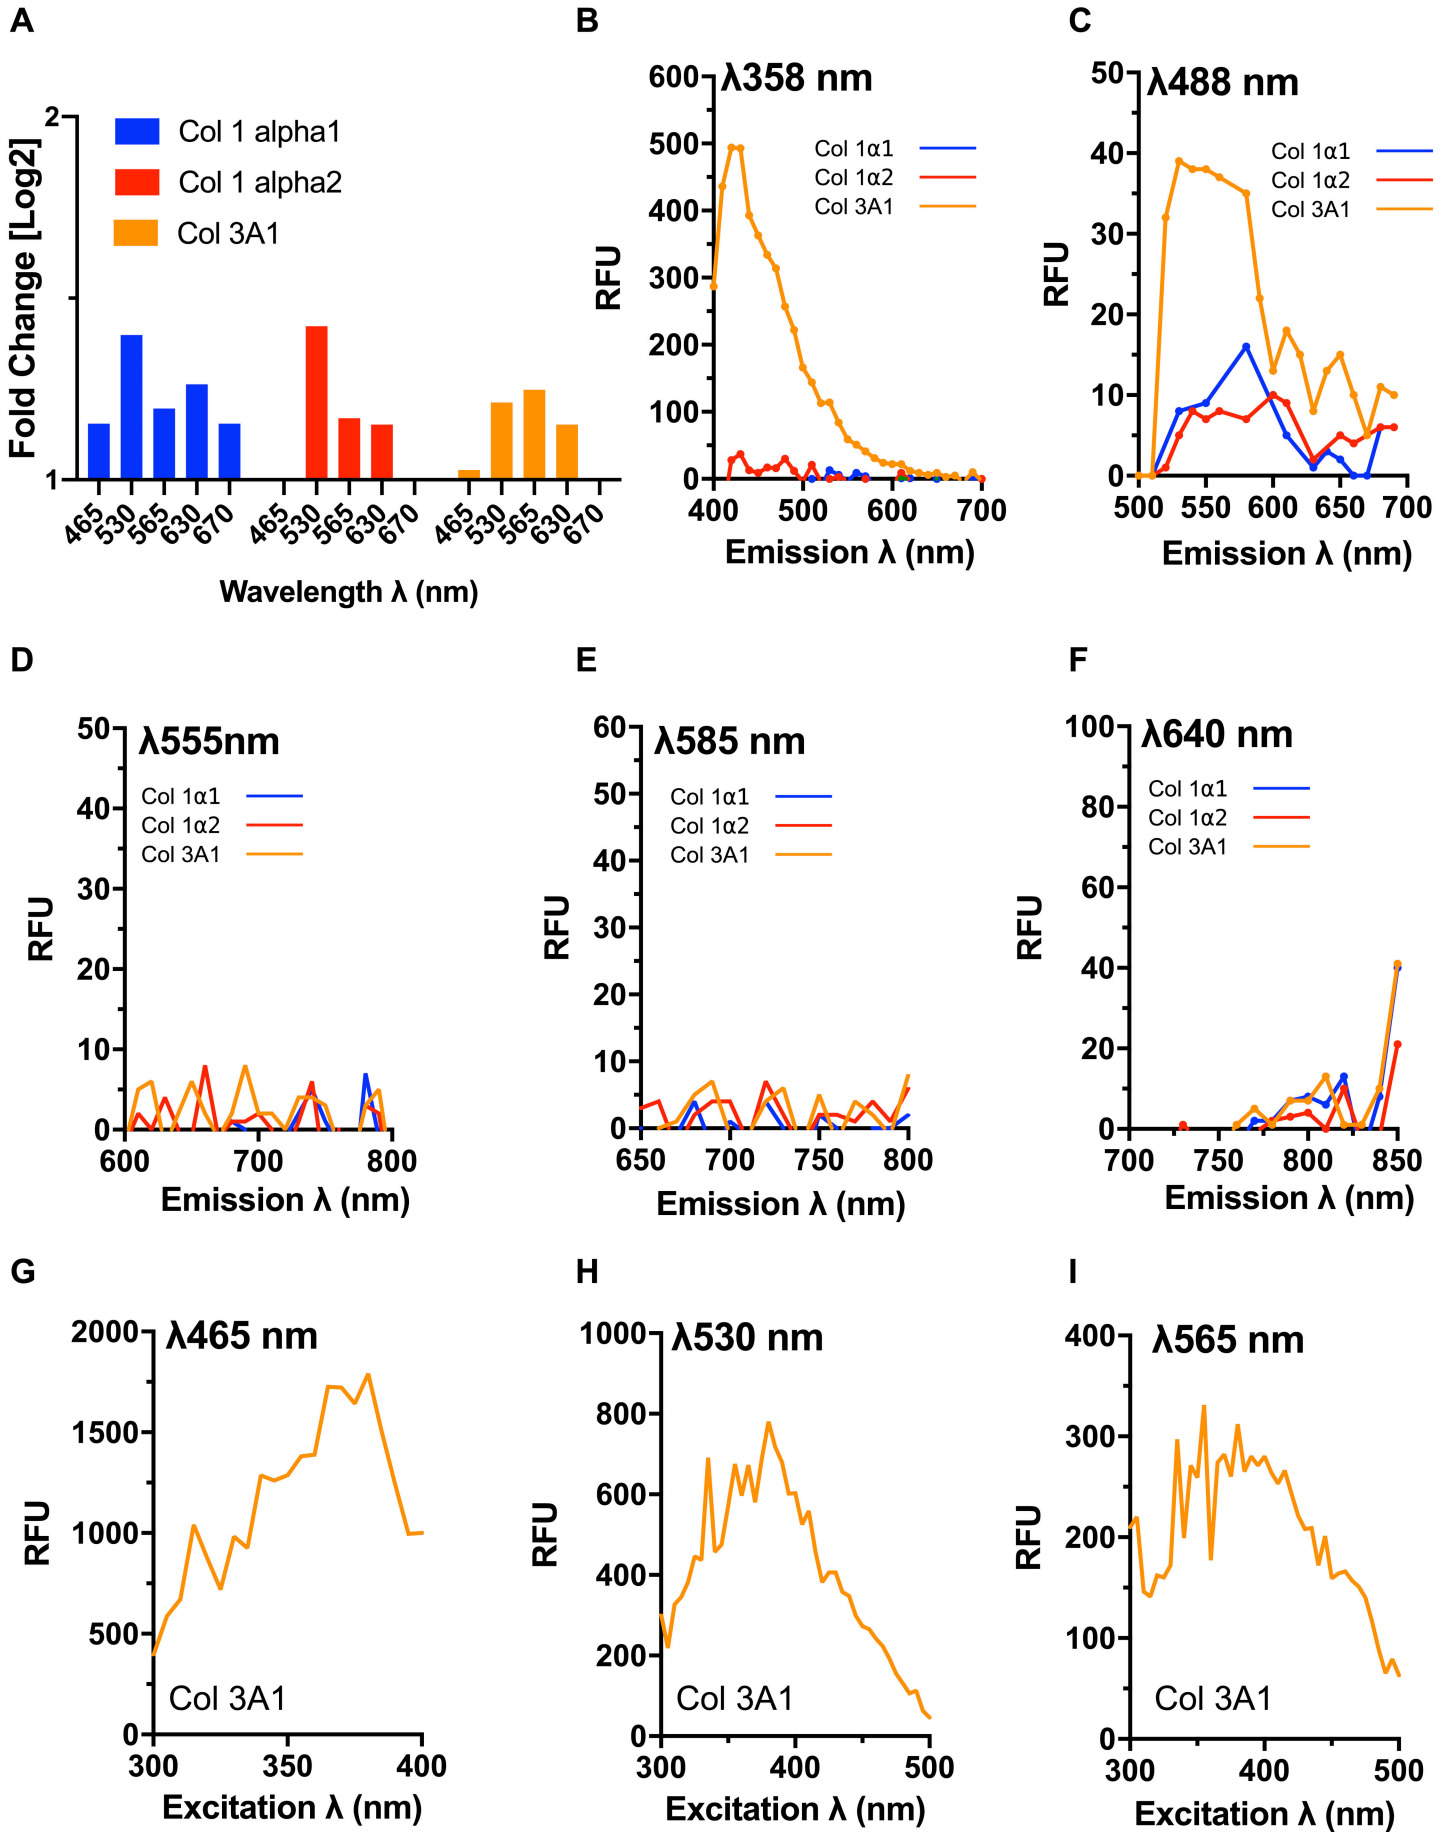

Supplement: 12015_2021_10125_MOESM1_ESM.pdf [file 12015_2021_10125_MOESM1_ESM.pdf]
