# Supplementary material
Source: PubMed Central journal article supplement (PMC8553674)

## Supplementary Table I

### Antibodies and their corresponding dilutions used in immunohistochemistry.

| Antibody/Product Name                                                      | Supplier/Product Number | Dilutions |
|----------------------------------------------------------------------------|-------------------------|-----------|
| Rabbit anti-mouse/rat alpha smooth muscle cell<br>$\alpha$ -actin antibody | Abcam (ab5694)          | 1/200     |
| Anti-Actin, $\alpha$ -Smooth Muscle antibody, Mouse<br>monoclonal          | Sigma (A5228)           | 1/200     |
| Anti-S100- $\beta$ (CT) Antibody, clone EP1576Y,<br>rabbit monoclonal      | Millipore (04-1054)     | 1/100     |
| Chicken anti-GFP antibody                                                  | Abcam (ab13970)         | 1/1000    |
| Rabbit Anti-RFP/dT antibody                                                | Abcam (ab62341)         | 1/1000    |

## Supplementary Table II

### Antibodies and their corresponding dilutions used in immunocytochemistry/western blot.

| Antibody/Product Name                                         | Supplier/Product Number | Dilutions |
|---------------------------------------------------------------|-------------------------|-----------|
| Rabbit anti-mouse Calponin [EP798Y]                           | Abcam (ab46794)         | 1/200     |
| Goat anti-mouse/rat/human smooth muscle<br>Myosin heavy chain | Santa Cruz (sc-79079)   | 1/200     |
| Rabbit Anti-S100 $\beta$                                      | Merck Millipore (ABN59) | 1/100     |
| Rabbit Anti-mouse/rat S100 $\beta$ [EP1576Y]                  | Abcam (ab52642)         | 1/100     |
| Alexa Fluor® 488 Goat anti-mouse IgG                          | Invitrogen (A-11001)    | 1/1000    |
| Alexa Fluor® 488 Goat anti-rabbit IgG                         | Invitrogen (A-11008)    | 1/1000    |

|                                       |                      |        |
|---------------------------------------|----------------------|--------|
| Alexa Fluor® 488 Donkey anti-goat IgG | Invitrogen (A-11055) | 1/1000 |
|---------------------------------------|----------------------|--------|

### Supplementary Table III

#### Antibodies used in Chromatin Immunoprecipitation (ChIP)

| Antibody/Product Name                                       | Supplier/Product Number            |
|-------------------------------------------------------------|------------------------------------|
| Rabbit anti-mouse Tri-Methyl-Histone H3 (Lys27)<br>[C36B11] | Cell Signalling Technology (9733S) |
| Rabbit anti-mouse Di-Methyl-Histone H3 (Lys4)<br>[C64G9]    | Cell Signalling Technology (9725S) |
| Normal Rabbit IgG (ChIP graded)                             | Cell Signalling Technology (2729)  |

### Supplementary Table IV

#### Customised primers used in this study from Integrity DNA Technology (IDT).

| Customised primer | Sequences                                           |
|-------------------|-----------------------------------------------------|
| Mm_Sm-mhc (Myh11) | Forward 5' - GCA GTG AGC TCT CAG TCA TC - 3'        |
|                   | Reverse 5' - CAA TGC CTC CTC TGA CAA GT - 3'        |
| Mm_Cnn1           | Forward 5' - GCT TGT CTG CTG AAG TAA AGA AC - 3'    |
|                   | Reverse 5' - TCC ATG AAG TTG TTC CCG ATG - 3'       |
| Mm_Hprt           | Forward 5' - GGC TAT AAG TTC TTT GCT GAC CTG C - 3' |
|                   | Reverse 5' - GCT TGC AAC CTT AAC CAT TTT GGG - 3'   |
| Mm_Gapdh          | Forward 5' - GCC TCC AAG GAG TAA GAA AC - 3'        |
|                   | Reverse 5' - GCC TCC AAG GAG TAA GAA AC - 3'        |

|                   |         |                                      |
|-------------------|---------|--------------------------------------|
| Mm_Sm-mhc (Myh11) | Forward | 5' - CCC TCC CTT TGC TAA ACA CA - 3' |
| for CHIP PCR      | Reverse | 5' - CCA GAT CCT GGG TCC TTA CA - 3' |

**Primers used in this study from QIAGEN.**

| Primer  | Product Name                           | Product Code |
|---------|----------------------------------------|--------------|
| mHprt-1 | Mm_Hprt_1_SG QuantiTect Primer Assay   | QT00166768   |
| mGapdh  | Mm_Gapdh_3_SG QuantiTect Primer Assay  | QT01658692   |
| mCol3A1 | Mm_Col3A1_3_SG QuantiTect Primer Assay | QT01055516   |

## Supplemental Figure Legends

Figure S1. **Single cell photonics of Ramos B and J774A.1 macrophages.** **a.** Visualisation of Ramos B and J774A.1 cells on each V-cup in the LoAD platform. **b.** PCA loading plots of Ramos B and J774A.1 cells. **c.** LDA of Ramos B and J774A.1 cells. Data are from 55 cells/group over five wavelengths. **d-g.** Single cell auto-fluorescence photon emissions across five wavelengths from (D, F) Ramos B cells and (E, G) J774A.1 cells *in vitro* compared to sham (D, E) and ligated cells (F, G) *ex vivo*. Data are the Log<sub>2</sub> fold increase and represent the mean  $\pm$  SEM of 55-178 cells/group, #p $\leq$ 0.001 vs Sham (D,E) Ligated (F,G). **h.** PCA loading plots of sham (black), ligated (orange), Ramos B (red) and J774A.1 (blue) cells. **i.** LDA plots of sham (black), ligated (orange) cells *ex vivo* and Ramos B (red) and J774A.1 (blue) cells *in vitro*. Data are from 466 cells across the five wavelengths **j.** Confusion matrix of true class and predicted class following a leave-one-out cross-validation procedure by the LDA classifier.

Figure S2. **Single cell photonics of MSC cells and their myogenic progeny compared to aortic SMC, Movas SMC, Ramos B cells and J774A.1 macrophages *in vitro*.** **a.** PCA loading plots of MSCs and their myogenic progeny, Ramos B cells and J774A.1 macrophages. Data are from 55-79 cells/group. **b.** LDA plot of MSCs and their myogenic progeny, Ramos B cells and J774A.1 macrophages. **c.** PCA loading plots of MSCs and their myogenic progeny, aortic SMCs and Movas SMCs. **d.** LDA plots of MSCs and their myogenic progeny, aortic SMCs and Movas SMCs. Data are from 55-79 cells/group. **e.** Confusion matrix of true class and predicted class following a leave-one-out cross-validation procedure using the LDA classifier. Data are from 378 cells across five wavelengths. **f.** Confusion matrix of true class and predicted class following a leave-one-out cross-validation procedure using the LDA classifier. Data are from 378 cells across five wavelengths.

Figure S3. **Single cell photonics of C3H10T1/2 cells and their myogenic progeny compared to Ramos B, J774A.1, aortic SMC, Movas SMC and MSC and their myogenic progeny *in vitro*.** **a.** PCA loading plots of C3H10T1/2 cells and their myogenic progeny compared to Ramos B cells and J774A1 cells. **b.** LDA plots of C3H10T1/2 cells and their myogenic progeny compared to Ramos B cells and J774A1 cells. **c.** PCA loading plots of C3H10T1/2 cells and their myogenic progeny, aortic SMCs and Movas SMCs. Data are from 55 cells/group. **d.** LDA plots of C3H10T1/2 cells and their myogenic progeny, aortic SMCs and Movas SMCs. **e.** PCA loading plots of C3H10T1/2 cells and their myogenic progeny, MSCs and their myogenic progeny. Data are from 55-79 cells/group. **f.** LDA plots of C3H10T1/2 cells and their myogenic progeny, MSCs and their myogenic progeny. **g.** Confusion matrix of true class and predicted class following a leave-one-out cross-validation procedure using the LDA classifier. Data are from 220 cells across five wavelengths. **h.** Confusion matrix of true class and predicted class following a leave-one-out cross-validation procedure using the LDA classifier. Data are from 367 cells across five wavelengths.

Figure S4. **Single cell photonics of mVSc and their myogenic progeny compared to aortic SMC, Movas SMC, Ramos B and J774A.1 macrophages.** **a.** Representative immunocytochemical analysis of S100 $\beta$  expression in mVSc. **b.** Visualisation of mVSc and their myogenic progeny on each V-cup in the LoaD platform. **c.** PCA loading plots of mVSc and their myogenic progeny, aortic SMCs and Movas SMCs. Data are from 55 cells/group. **d.** LDA plot of mVSc and their myogenic progeny, aortic SMCs and Movas SMCs. Data are from 55 cells/group. **e.** Confusion matrix of true class and predicted class following a leave-one-out cross-validation procedure using the LDA classifier. Data are from 319 cells across five wavelengths. **f.** PCA loading plots of mVSc and their myogenic progeny, Ramos B cells and J774A.1 macrophages. Data are from 55 cells/group. **g.** LDA plot of mVSc and their myogenic progeny, Ramos B cells and J774A.1 macrophages. Data are from 55 cells/group. **h.** Confusion matrix of true class and predicted class following a leave-one-out cross-validation procedure using the LDA classifier. Data are from 319 cells across five wavelengths.

Figure S5. **Single cell photonics of mVSc and their myogenic progeny compared to MSCs and their myogenic progeny.** **a.** PCA loading plots of mVSc and their myogenic progeny, and MSC and their myogenic progeny. Data are from 55-79 cells/group. **b.** LDA plot of mVSc and their myogenic progeny, and MSC and their myogenic progeny. Data are from 55-79 cells/group. **c.** Confusion matrix of true class and predicted class following a leave-one-out cross-validation procedure using the LDA classifier. Data are from 487 cells across five wavelengths.

Figure S6. **Single cell diameter measurements of cells isolated from sham and ligated vessels *ex vivo*, and aortic SMCs, Ramos B cells and myogenic progeny *in vitro*.** **a.** Diameter measurements of cells isolated from sham and ligated vessels captured on V-cups compared to aortic SMCs. **b.** Diameter measurements of MSCs before and after myogenic differentiation with TGF- $\beta$ 1 for 14d. **c.** Diameter measurements of C3H 10T1/2 cells before and after myogenic differentiation with TGF- $\beta$ 1 for 14 d. **d.** Diameter measurements of Ramos B cells before and after treatment with TGF- $\beta$ 1 for 14 d. Data are from 25 cells/group.

Figure S7. **The effect of myogenic differentiation on S100 $\beta$  stem cell metabolism.** **a.** The level of glucose, **b.** glutamine and **c.** lactate release in conditioned media from S100 $\beta$  mVSc before and after treatment with the myogenic stimulus, Jag-1 (1 $\mu$ g/ml) over time. **d-f.** The level of glucose consumption, glutamine consumption and lactate release in conditioned media after treatment with Jag-1 (1 $\mu$ g/ml) in the absence or presence of Notch inhibitor, DAPT (100 $\mu$ M). \* $p < 0.05$  vs Fc Control, #  $p < 0.05$  vs Jag1. Data are mean  $\pm$  SEM of three individual wells.

Figure S8. **Collagen autofluorescence.** **a.** Representative autofluorescence photon emissions from recombinant Col 1 $\alpha$ 1, Col 1 $\alpha$ 2, and Col3A1 across five wavelengths using the Load platform. Data are corrected for background emissions from media. Data are the Log2 fold increase and represent the mean of three samples **b-f.** Autofluorescence emission spectra from Col 1 $\alpha$ 1, Col 1 $\alpha$ 2, and Col3A1 following excitation at  $\lambda$ 358- 565 nm. Data are representative of two independent experiments. **g-i.** Autofluorescence emission spectra from

Col3A1 at  $\lambda 465$ ,  $\lambda 530$  and  $\lambda 565$  following excitation at  $\lambda 300-500$  nm. Data are representative of two independent experiments. Data are corrected for background emissions from PBS.

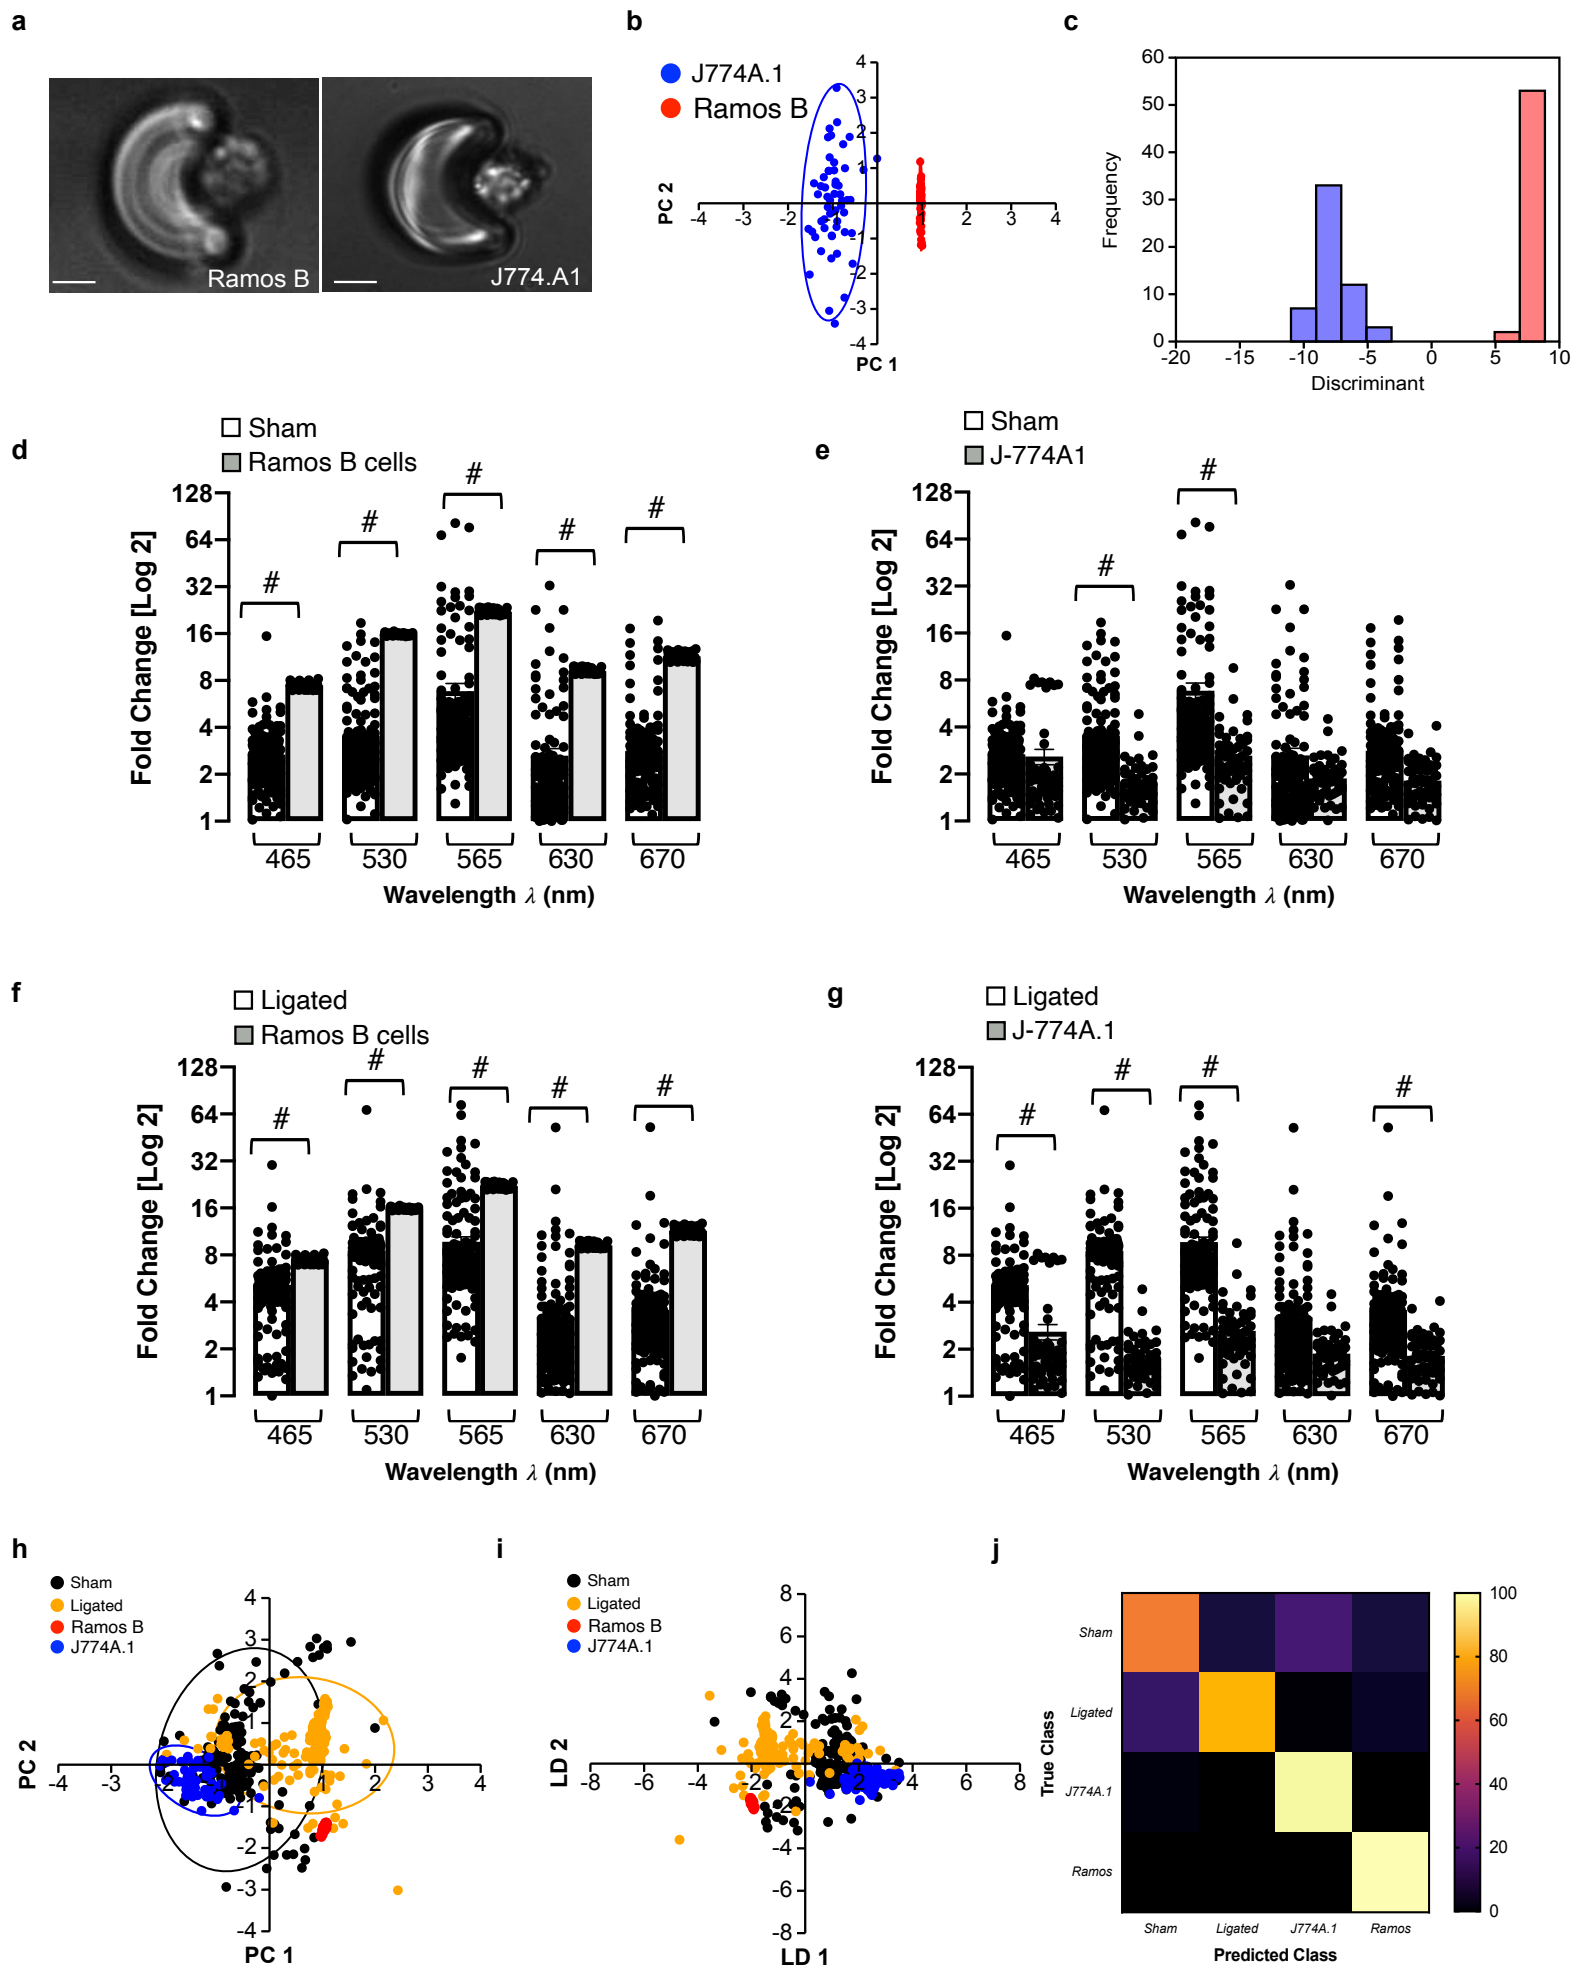

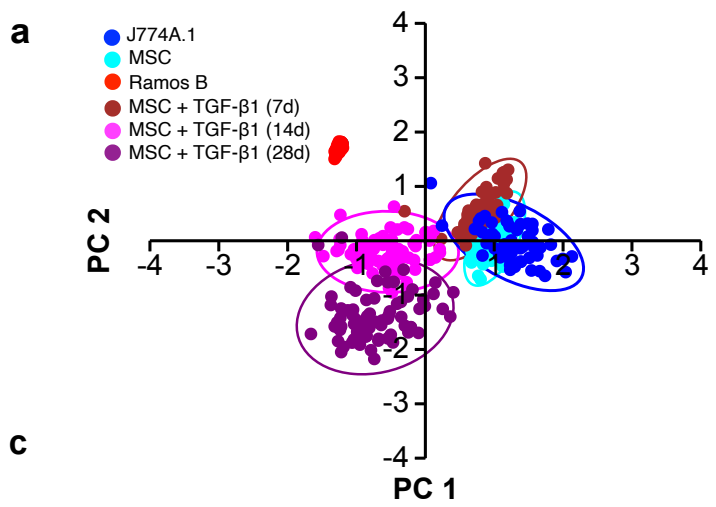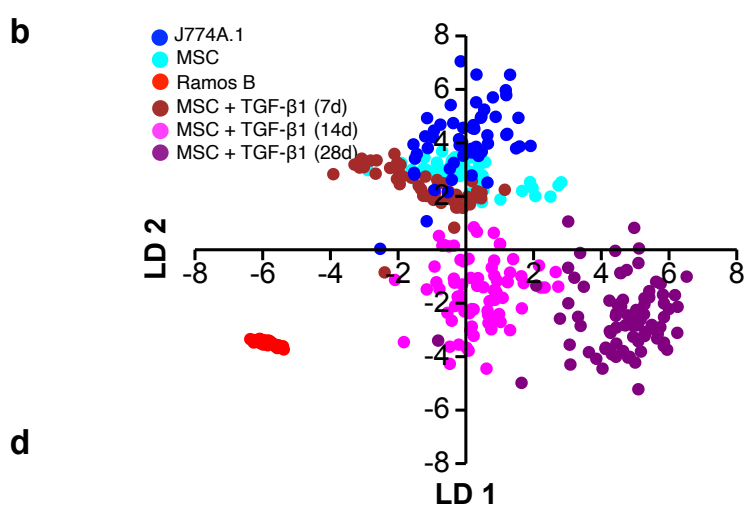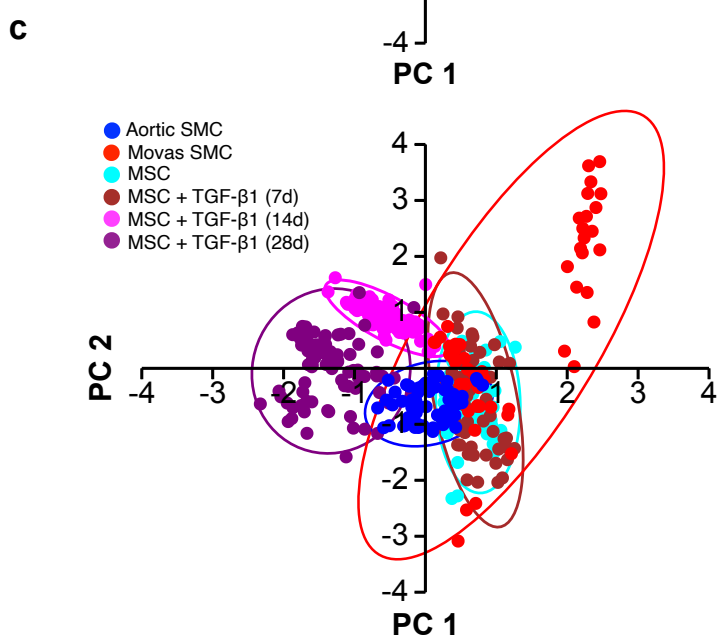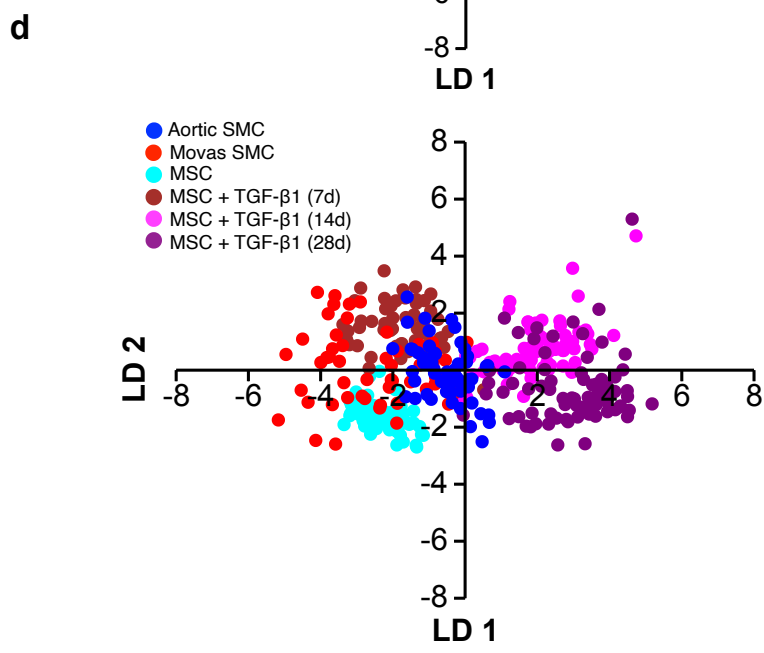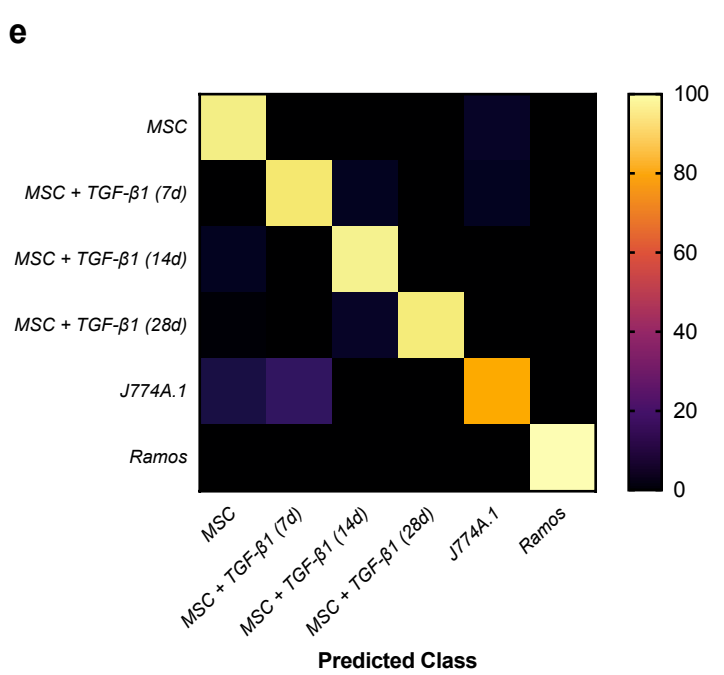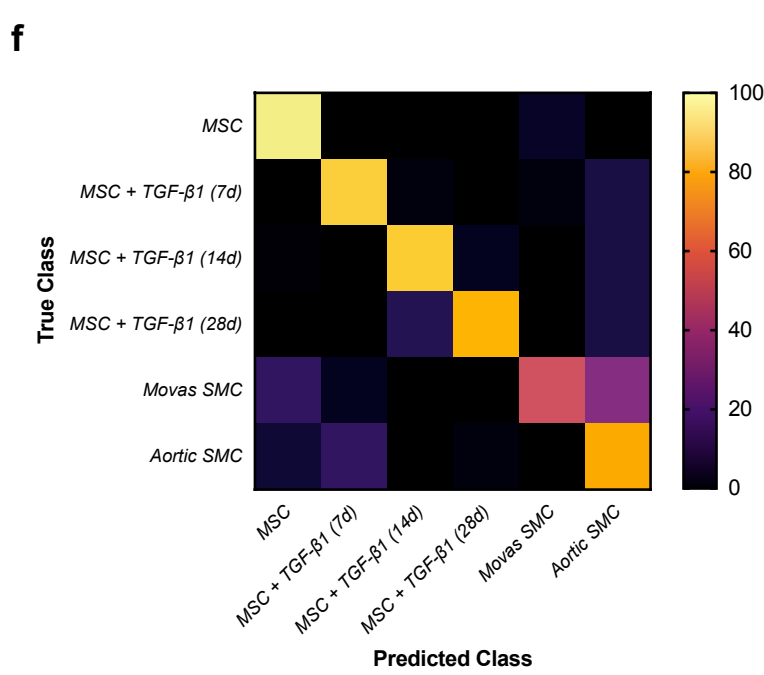



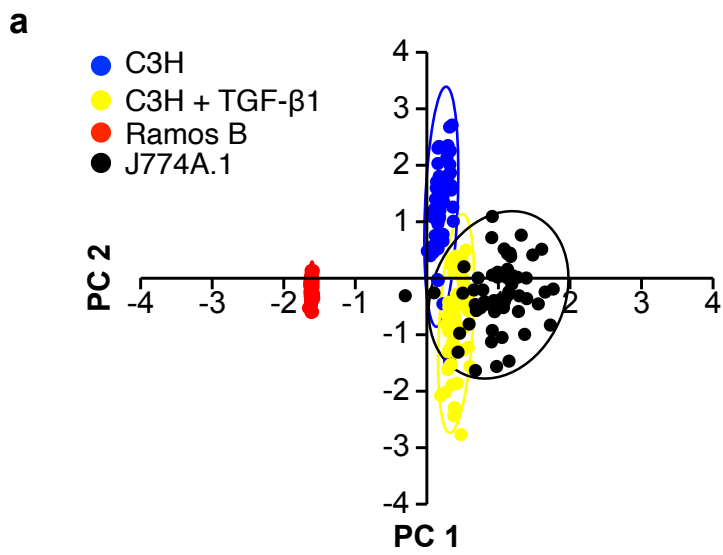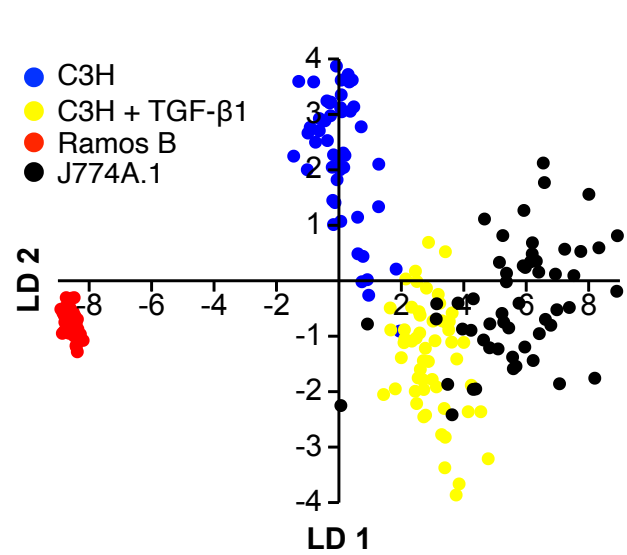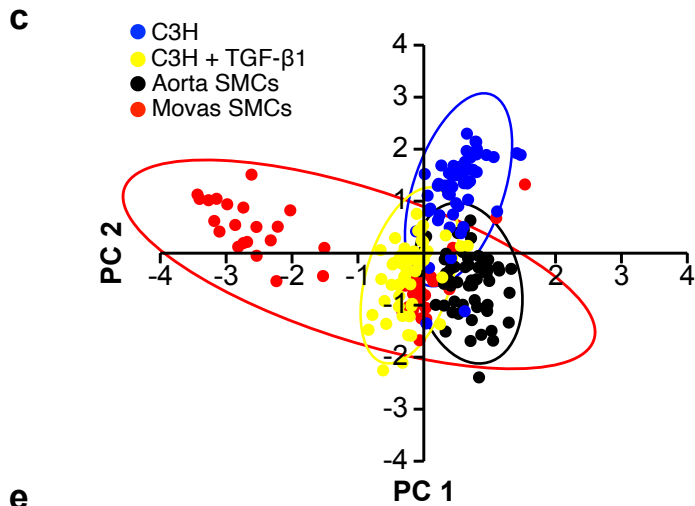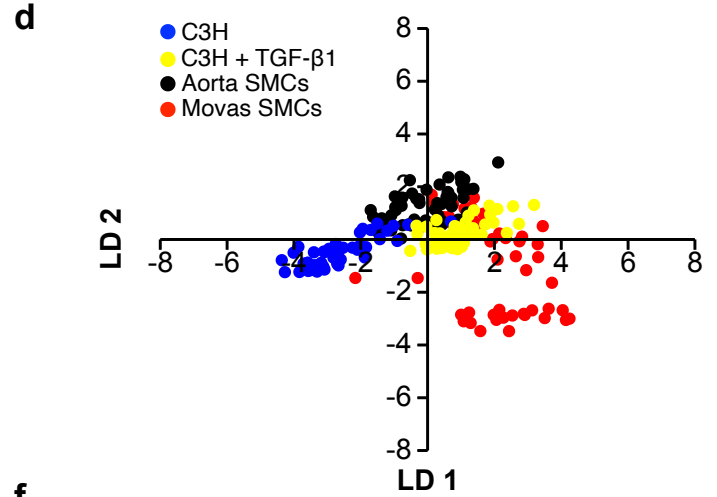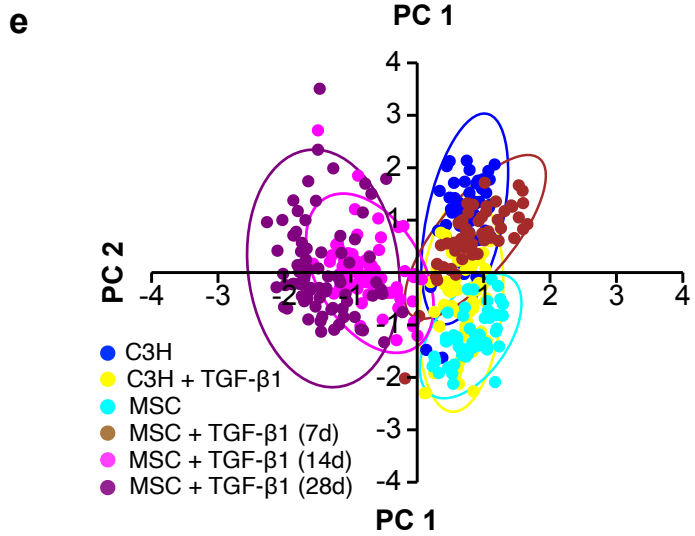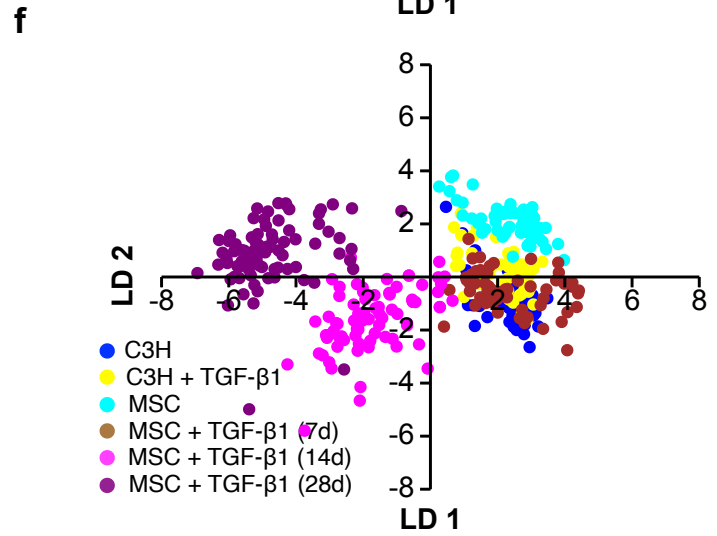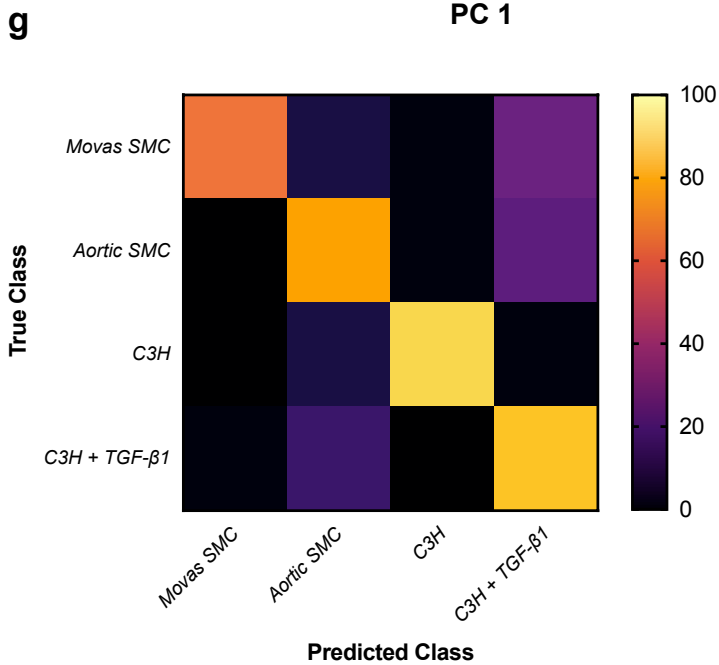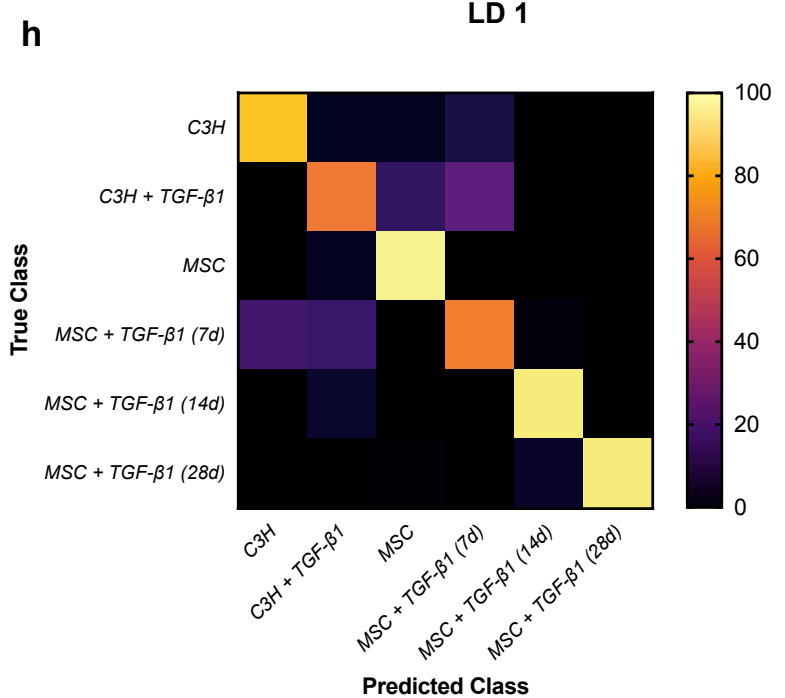

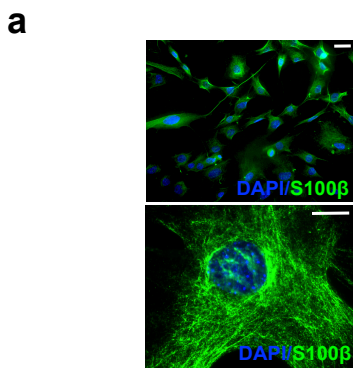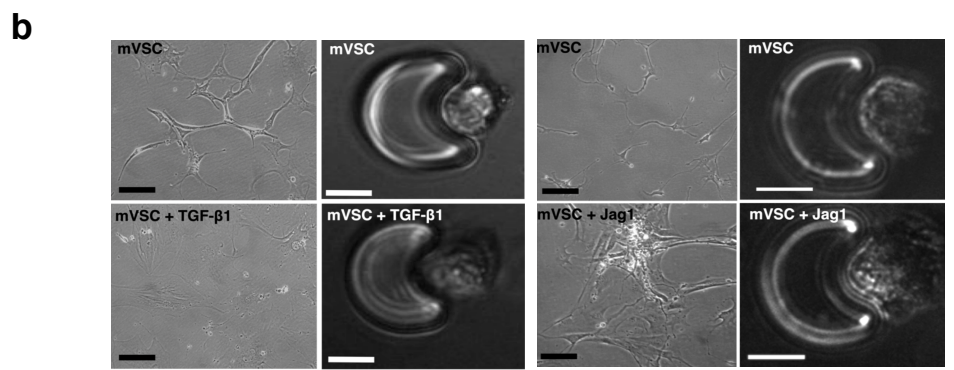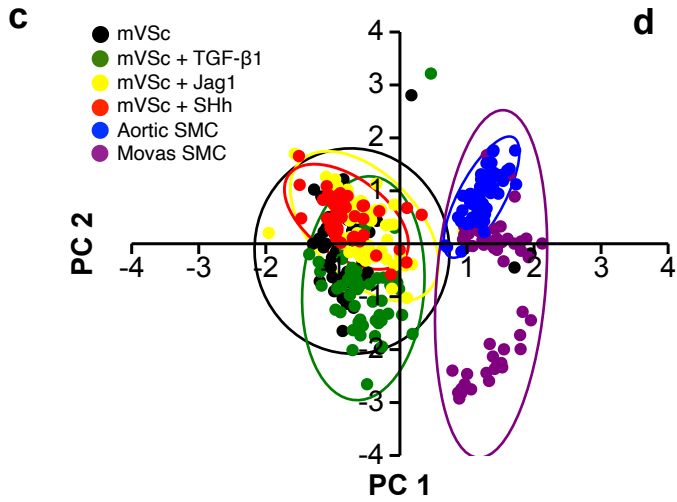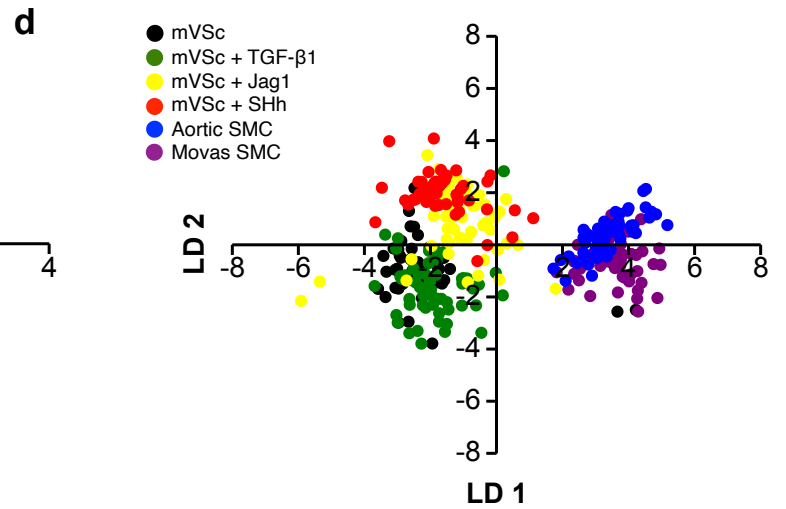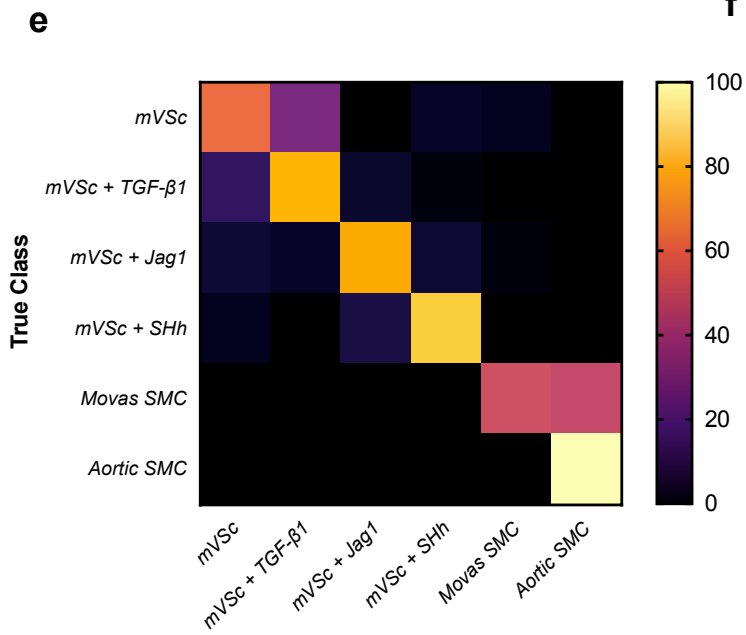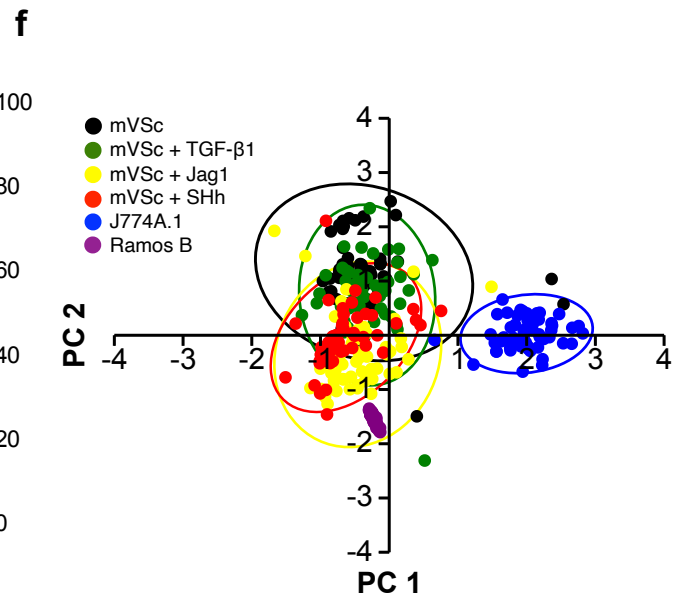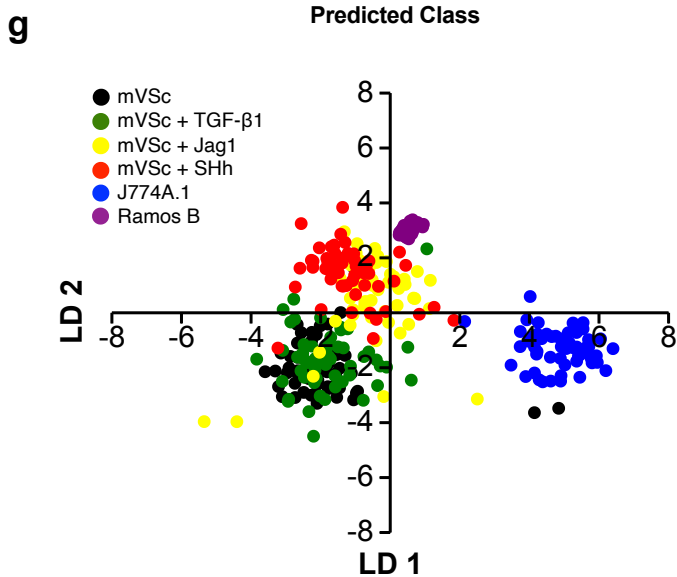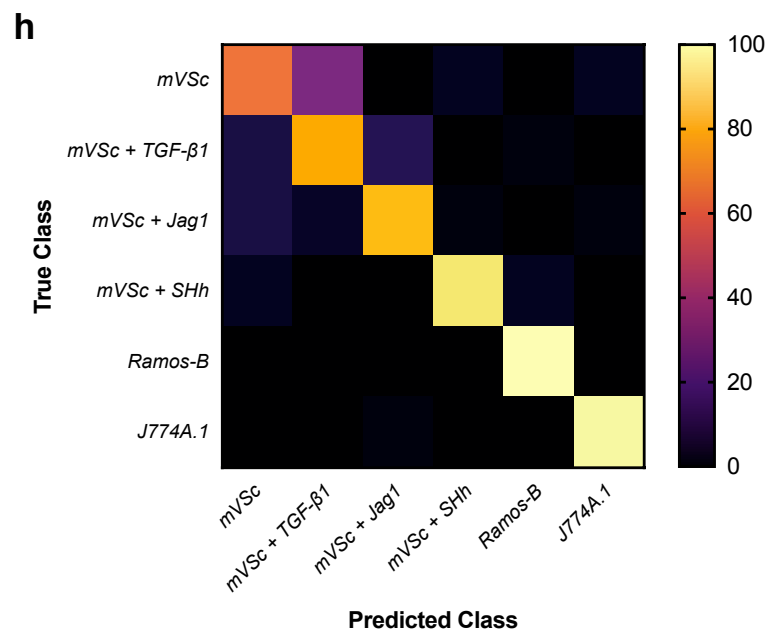



**a**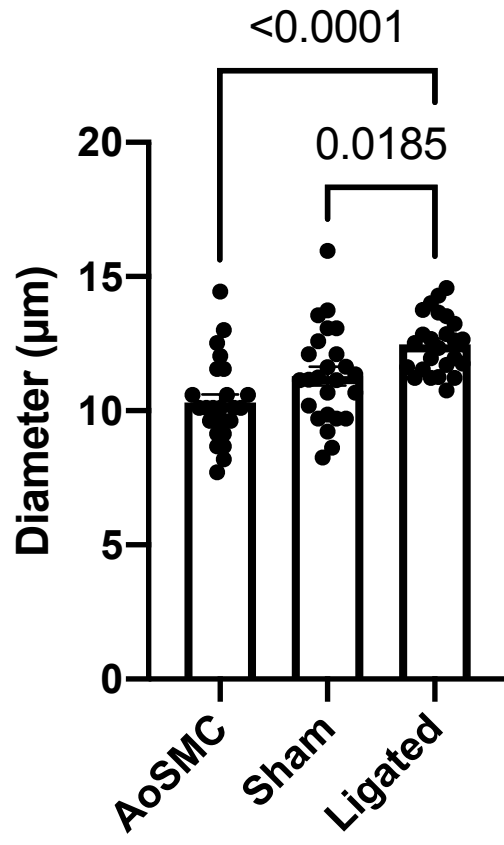**b**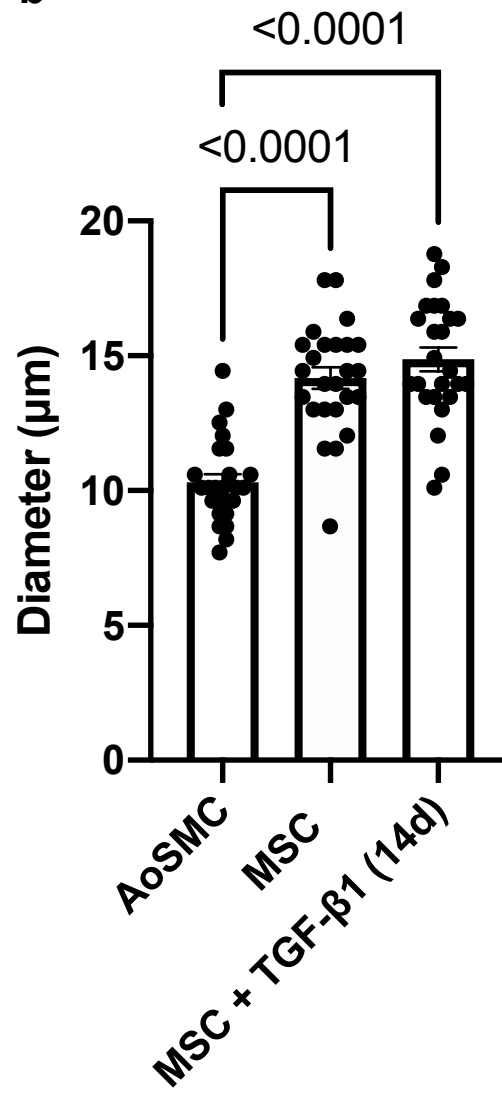**c**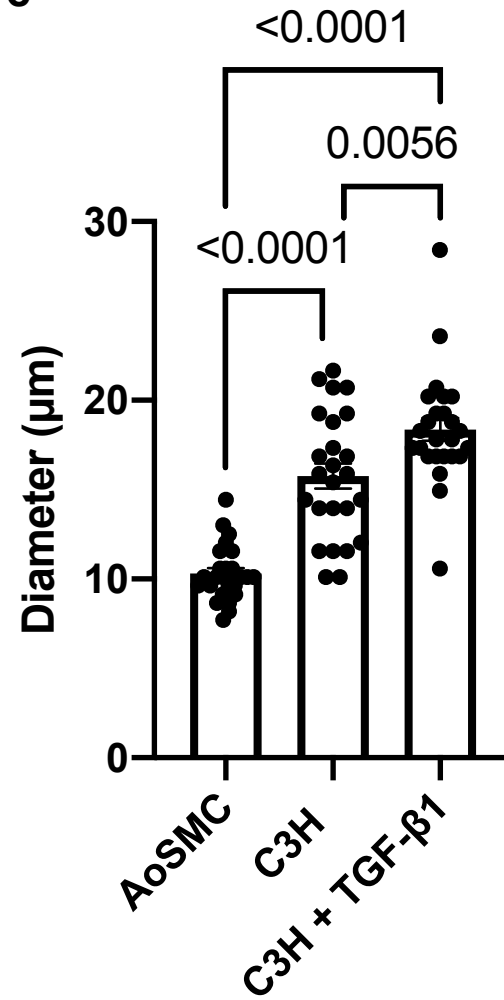**d**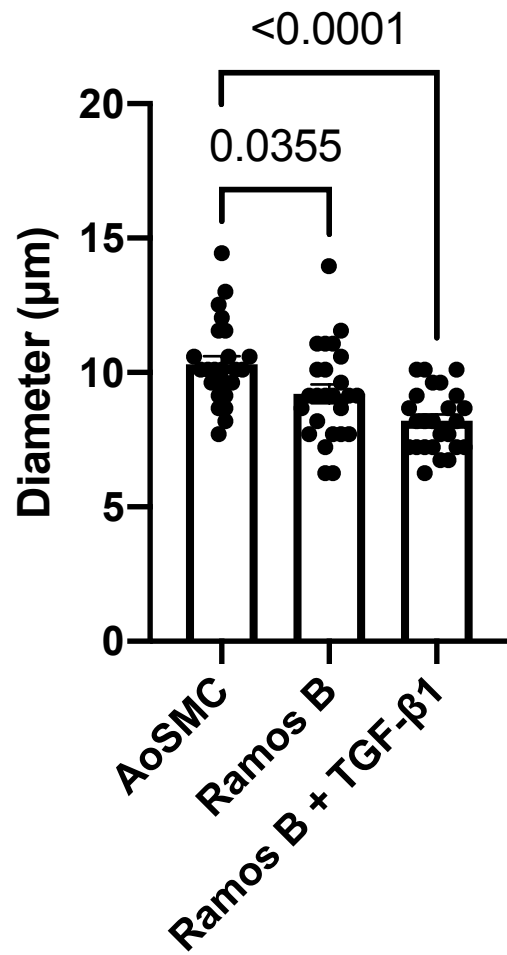

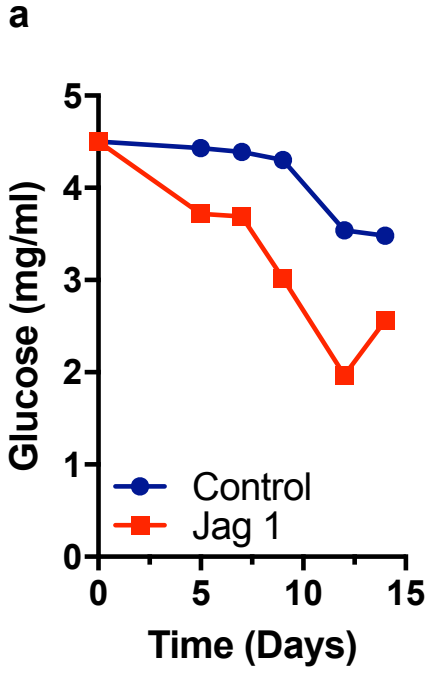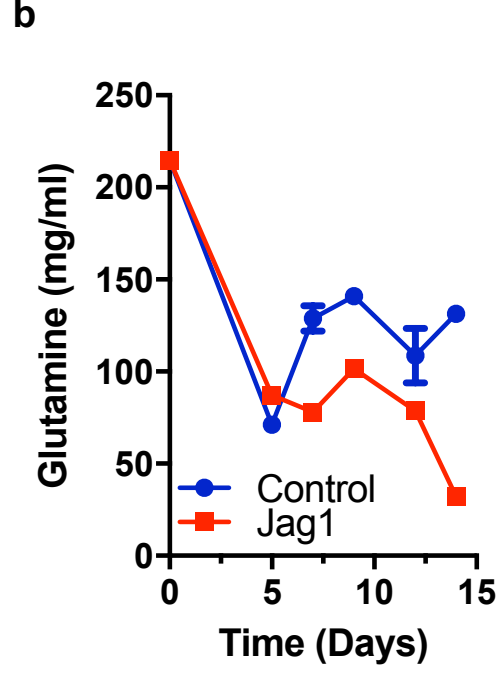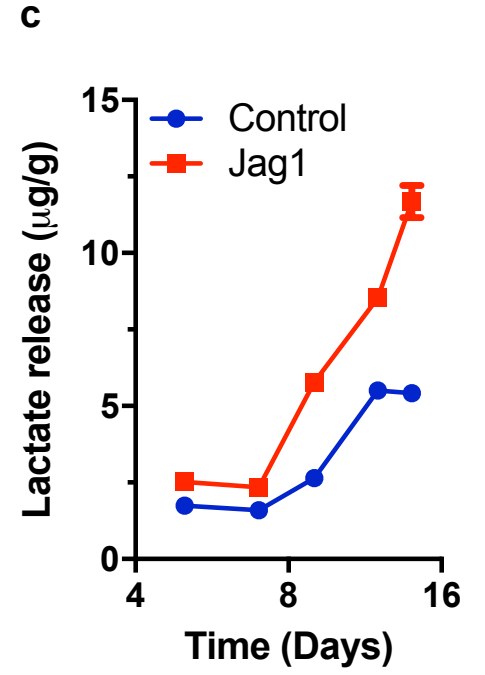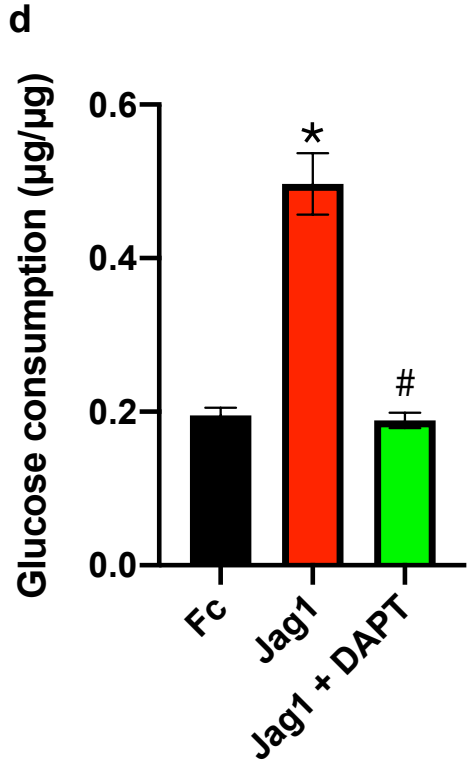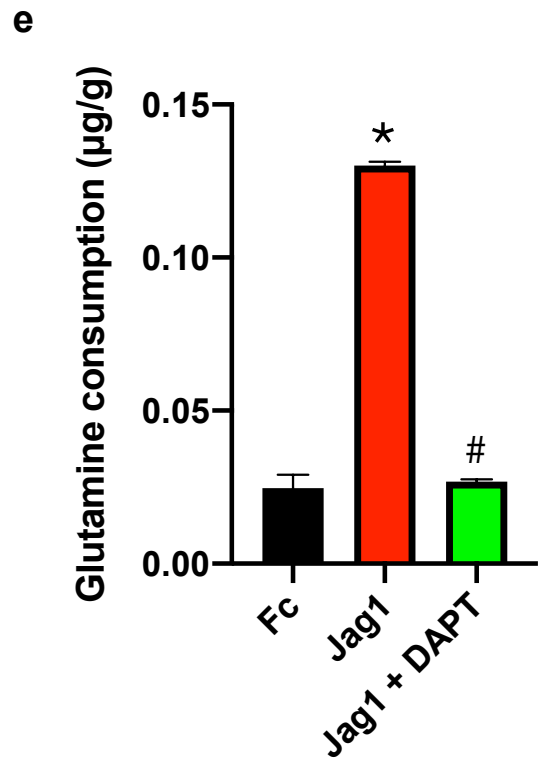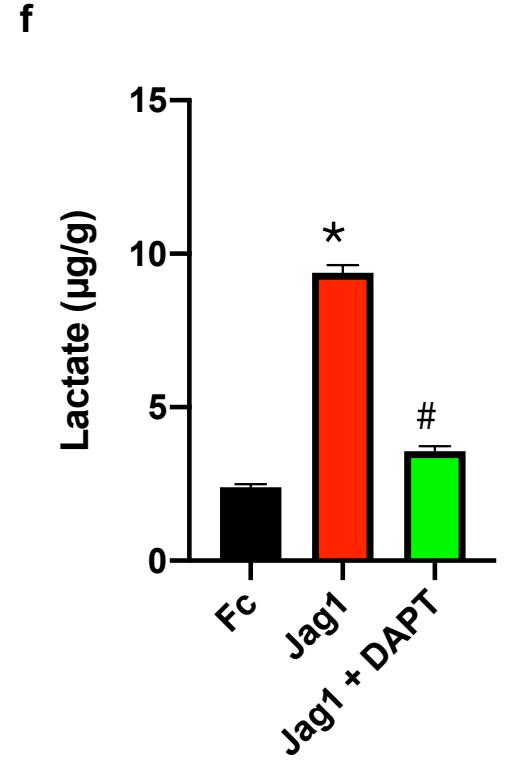

**a**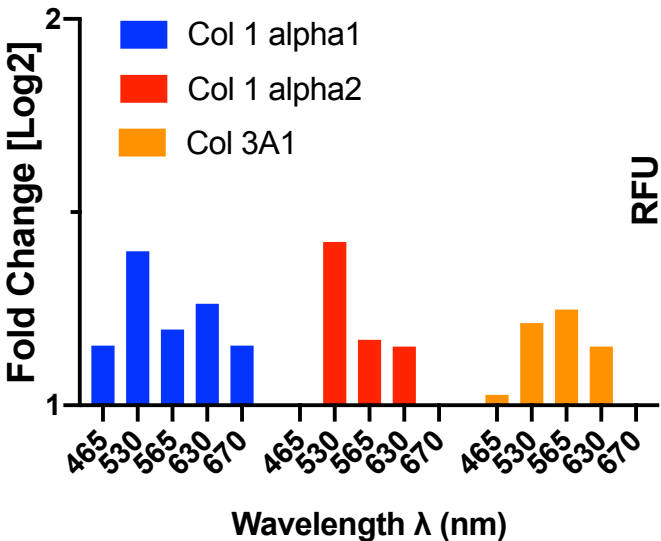**b**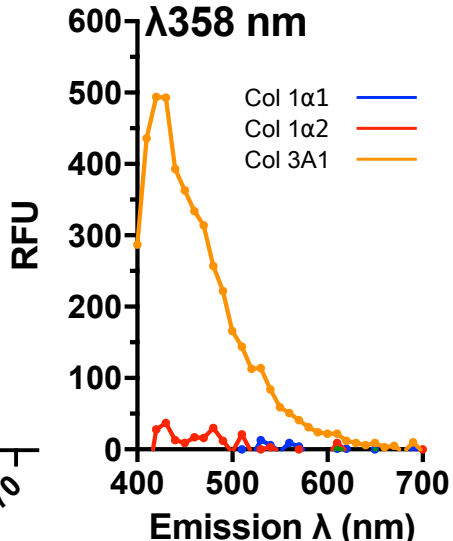**c**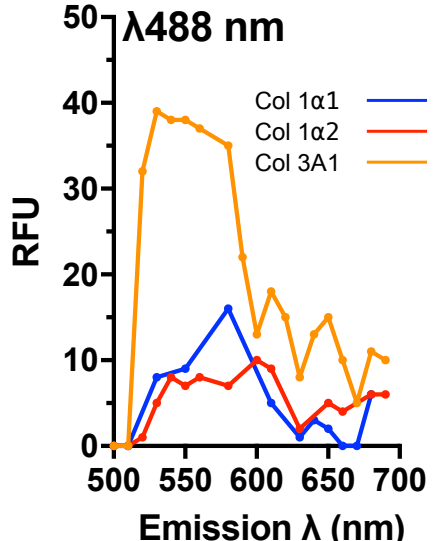**d**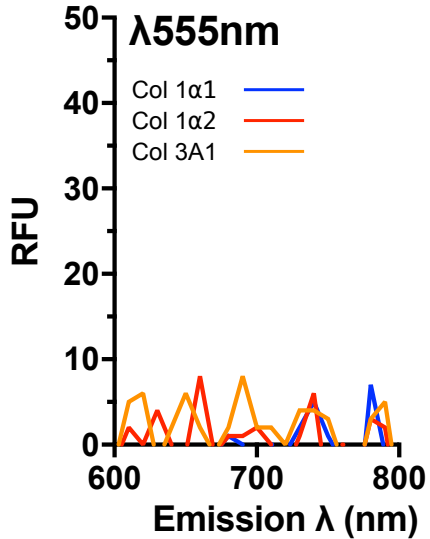**e**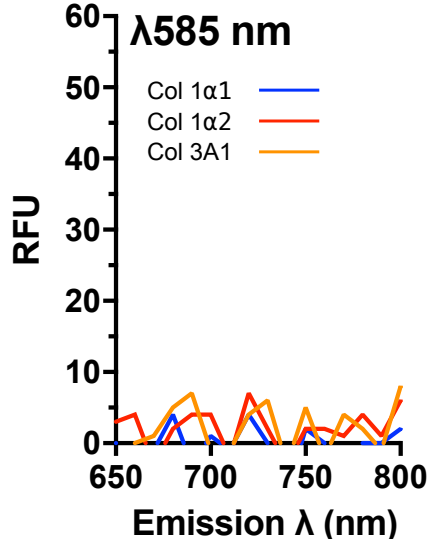**f**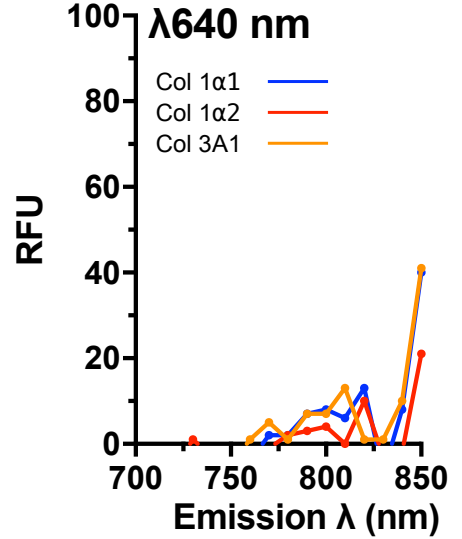**g**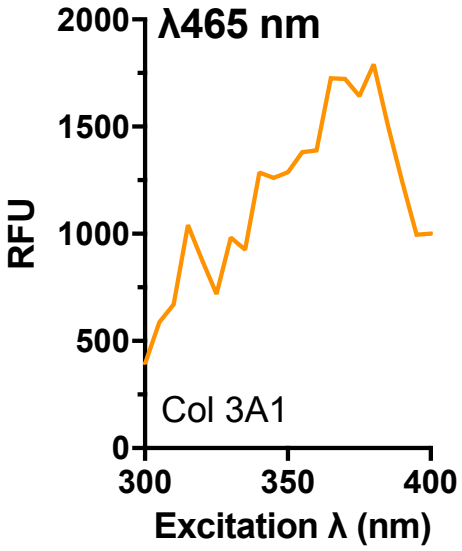**h**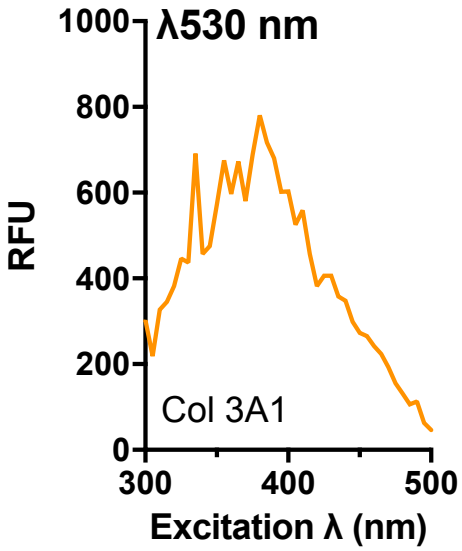**i**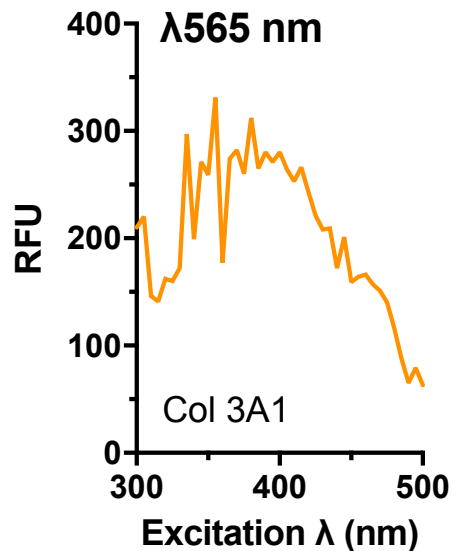

Supplement: 12015_2021_10125_MOESM2_ESM.pdf [file 12015_2021_10125_MOESM2_ESM.pdf]
